# Supplementary material for: NF-E2, FLI1 and RUNX1 collaborate at areas of dynamic chromatin to activate transcription in mature mouse megakaryocytes
Source: PubMed Central journal article supplement (PMC4960521; doi:10.1038/srep30255), 2016-07-26
Supplement: srep30255-s1.pdf [file srep30255-s1.pdf]

# NF-E2, FLI1 and RUNX1 collaborate at areas of dynamic chromatin to activate transcription in mature mouse megakaryocytes

Chongzhi Zang, Annouck Luyten, Justina Chen, X. Shirley Liu, and Ramesh A. Shivdasani

## SUPPLEMENTARY MATERIALS

### Supplementary Figure and Table Legends

**Suppl. Figure 1. ChIP-seq analysis of NF-E2 and other megakaryocyte TFs.** (a) Summary of unique sequence tags and peak calls from ChIP-seq experiments with different antibodies in MK cell populations. (b) Distribution of H3K4me2 marked nucleosomes in MK, showing that the majority lie in introns and intergenic regions. (c) PhastCons conservation plot of NF-E2 binding sites. (d,e) Integrated Genome Viewer (IGV) traces showing NF-E2 occupancy far (>250 kb) from *Tubb1* (d) and at 5 sites within 20 kb of *Tbxas1* (e). Magnified regions on the right highlight NF-E2 binding in H3K4me2-marked chromatin.

**Suppl. Figure 2. Features of FLI1 and RUNX1 expression and binding in MK.** (a) mRNA expression levels of TF genes in immature (IMM) and mature (MAT) MK, as determined on Affymetrix microarrays. (b) IGV traces showing co-localization of FLI1 and RUNX1 in HPC-7 cells (top 2 rows) and binding of NF-E2 within H3K4me2-marked chromatin at some of the same sites in mature MK (bottom 4 rows). (c) IGV traces showing NF-E2 occupancy at the *Fli1* (top) and *Runx1* (bottom) gene loci. (d) Proportion of genes with nearby binding of the various combinations of NF-E2, FLI1, and RUNX1 that show higher expression in MK<sub>imm</sub>, relative to the genome background.

**Suppl. Table 1.** Differential expression and TF regulation pattern of 692 genes that were up-regulated during MK maturation.

**A**

| Antibody used for ChIP | Megakaryocyte population | Uniquely mapped ChIP-seq tags | MACS peaks | Positioned nucleosomes |
|------------------------|--------------------------|-------------------------------|------------|------------------------|
| H3K4me2                | IMM                      | 29,513,054                    | 48,279     | 242,533                |
| H3K4me2                | MAT                      | 16,032,555                    | 68,115     | 246,089                |
| NF-E2                  | IMM                      | 24,887,829                    | 1,168      |                        |
| NF-E2                  | MAT                      | 25,310,749                    | 6,765      |                        |
| FLI1                   | MAT                      | 71,361,159                    | 25,124     |                        |
| RUNX1                  | MAT                      | 45,311,238                    | 38,779     |                        |

**B**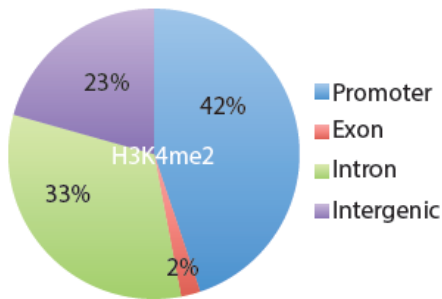**C**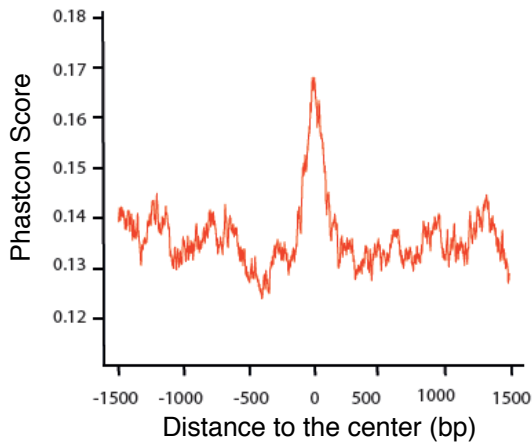**D****Chr2:  $\beta$ 1-tubulin**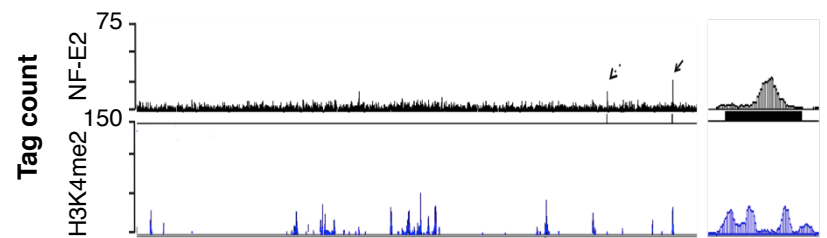**E****Chr6: Tromboxane synthetase 1**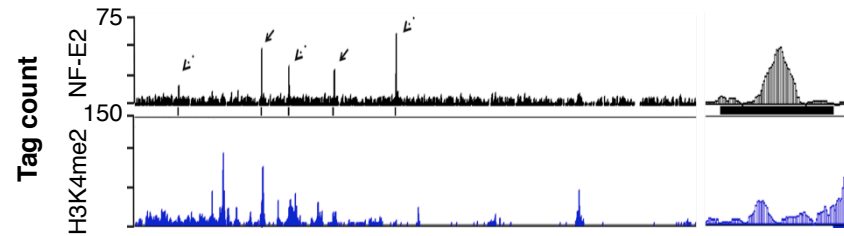

**A**

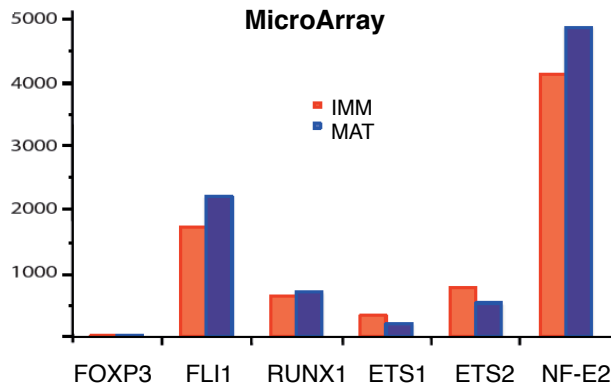

**B**

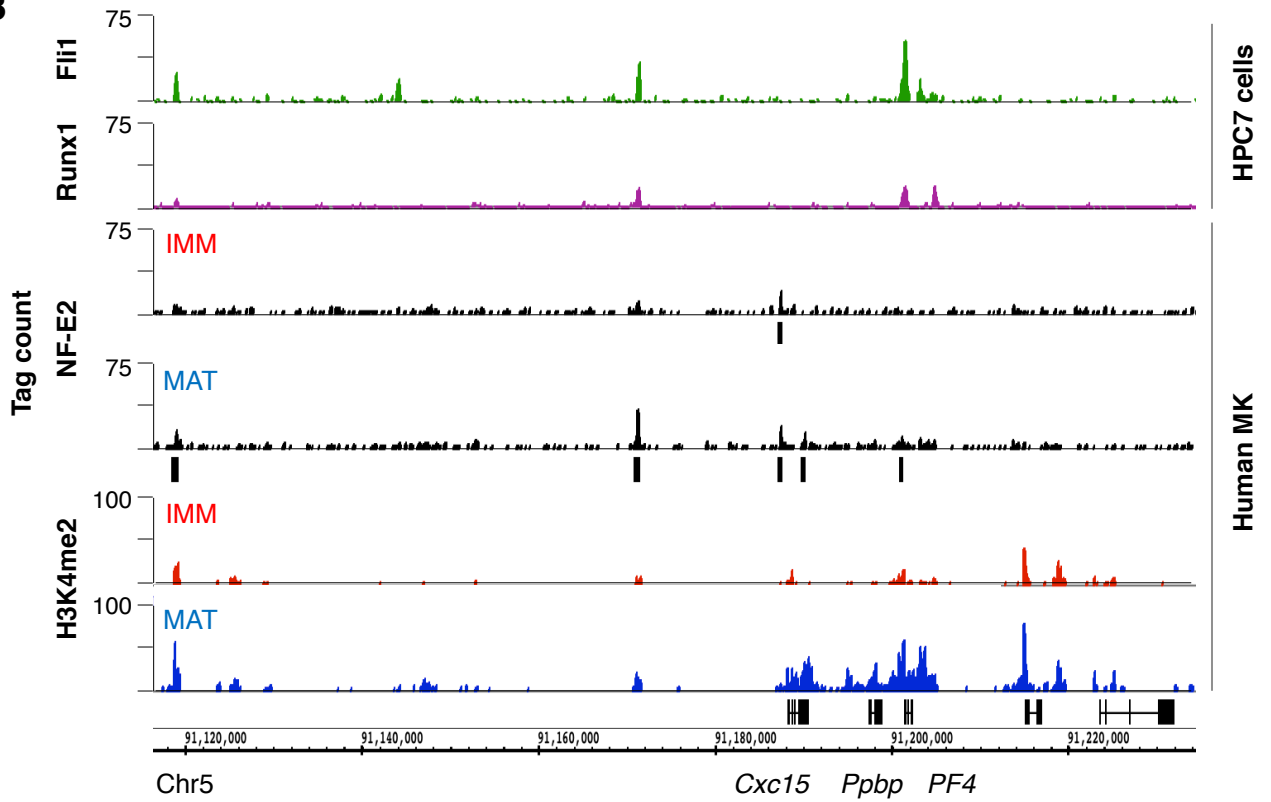

**C**

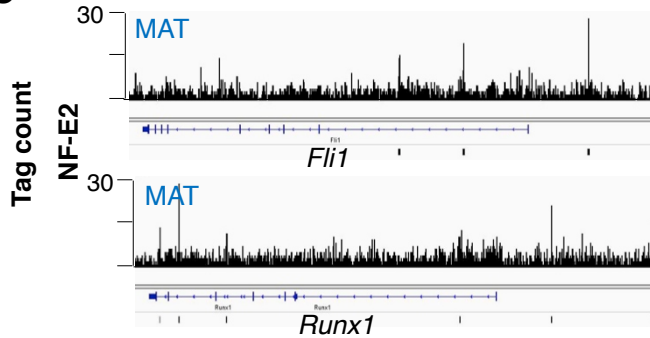

**D**

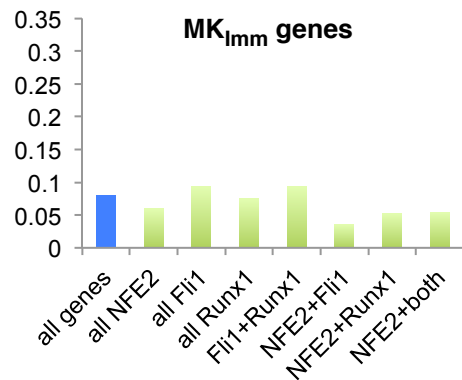

**Supplementary Table 1.** Differential expression and TF regulation pattern of 692 genes that are up-regulated during MK maturation

| RefSeq ID    | Gene Symbol | MK_MAT<br>log2FC | MK_MAT<br>p-value | NFE2<br>depen-<br>dency | NFE2<br>count<br><20kb | nearest<br>NFE2 (bp) | from<br>IMM | co-<br>FLI1 | co-<br>RUNX1 | nearest<br>FLI1 (bp) | nearest<br>RUNX1 (bp) |
|--------------|-------------|------------------|-------------------|-------------------------|------------------------|----------------------|-------------|-------------|--------------|----------------------|-----------------------|
| NM_010045    | Darc        | 5.090            | 1.730E-05         | -1                      | 0                      | 21736                | 1           | 0           | 0            | 138                  | 4215                  |
| NM_008293    | Hsd3b1      | 5.239            | 6.520E-05         | -1                      | 1                      | 2669                 | 1           | 0           | 0            | 281512               | 4482                  |
| NM_008221    | Hbb-y       | 6.531            | 1.708E-04         | 1                       | 1                      | 7887                 | 1           | 1           | 1            | 6659                 | 7917                  |
| NM_001114087 | Pdlim7      | 2.503            | 4.256E-04         | -1                      | 1                      | 2942                 | 1           | 1           | 0            | 145                  | 234                   |
| NM_001164557 | Pdzk1ip1    | 3.691            | 4.256E-04         | 1                       | 1                      | 14973                | 0           | 1           | 1            | 7107                 | 2141                  |
| NM_010484    | Slc6a4      | 6.164            | 5.022E-04         | -1                      | 1                      | 7544                 | 0           | 1           | 0            | 2056                 | 5539                  |
| NM_010016    | Cd55        | 2.222            | 5.168E-04         | -1                      | 1                      | 17130                | 0           | 0           | 0            | 337                  | 45807                 |
| NM_013750    | Phlda3      | 2.570            | 7.995E-04         | 0                       | 0                      | 128415               | 0           | 1           | 0            | 405                  | 42964                 |
| NM_024479    | Wbscr27     | 1.820            | 7.995E-04         | 0                       | 1                      | 18367                | 0           | 0           | 0            | 62                   | 19175                 |
| NM_172118    | Myl9        | 5.480            | 7.995E-04         | 0                       | 1                      | 8666                 | 0           | 0           | 0            | 34300                | 22100                 |
| NM_007657    | Cd9         | 1.906            | 8.292E-04         | 0                       | 2                      | 11178                | 0           | 0           | 0            | 4799                 | 8334                  |
| NM_133187    | Fam198b     | 2.513            | 8.997E-04         | 0                       | 0                      | 80920                | 0           | 1           | 0            | 76                   | 43                    |
| NM_011150    | Lgals3bp    | 2.656            | 9.627E-04         | 0                       | 0                      | 401171               | 1           | 0           | 0            | 2                    | 10338                 |
| NM_001160404 | Galnt1      | 1.547            | 9.627E-04         | 0                       | 1                      | 4040                 | 0           | 0           | 0            | 485                  | 44884                 |
| NM_025331    | Gng11       | 3.603            | 9.627E-04         | -1                      | 0                      | 86642                | 1           | 0           | 0            | 111                  | 111                   |
| NM_013885    | Clic4       | 1.454            | 9.627E-04         | 0                       | 0                      | 32957                | 0           | 0           | 0            | 170                  | 30                    |
| NM_028064    | Slc39a4     | 3.238            | 9.627E-04         | -1                      | 1                      | 527                  | 0           | 1           | 0            | 569                  | 4277                  |
| NM_013492    | Clu         | 3.668            | 9.627E-04         | 0                       | 1                      | 2813                 | 0           | 0           | 0            | 2187                 | 2224                  |
| NM_029001    | Elovl7      | 1.853            | 9.627E-04         | -1                      | 0                      | 28713                | 0           | 0           | 0            | 27481                | 5602                  |
| NM_001177751 | Tsc22d1     | 2.690            | 1.064E-03         | -1                      | 1                      | 9604                 | 0           | 0           | 0            | 17650                | 6066                  |
| NM_009025    | Rasa3       | 2.235            | 1.215E-03         | -1                      | 0                      | 63180                | 0           | 1           | 0            | 1102                 | 60028                 |
| NM_018762    | Gp9         | 3.832            | 1.215E-03         | -1                      | 0                      | 60784                | 0           | 1           | 0            | 108                  | 58                    |
| NM_001161724 | Ilk         | 1.338            | 1.215E-03         | -1                      | 0                      | 1305424              | 0           | 0           | 0            | 102                  | 74321                 |
| NM_009101    | Rras        | 1.490            | 1.215E-03         | 0                       | 1                      | 15352                | 0           | 0           | 0            | 598                  | 539                   |
| NM_001001892 | H2-K1       | 1.375            | 1.510E-03         | 0                       | 1                      | 5164                 | 0           | 0           | 0            | 49                   | 27450                 |
| NM_146006    | Lss         | 1.166            | 1.524E-03         | 0                       | 0                      | 44897                | 0           | 1           | 0            | 89                   | 103614                |
| NM_007440    | Alox12      | 4.228            | 1.524E-03         | -1                      | 1                      | 4998                 | 0           | 1           | 0            | 532                  | 1238                  |
| NM_001077361 | Fhl1        | 3.425            | 1.524E-03         | -1                      | 0                      | 188140               | 0           | 0           | 0            | 9648                 | 2709                  |

|              |               |       |           |    |   |        |   |   |   |       |        |
|--------------|---------------|-------|-----------|----|---|--------|---|---|---|-------|--------|
| NM_207648    | H2-gs10       | 2.239 | 1.524E-03 | 0  | 0 | 122965 | 0 | 0 | 0 | 92178 | 85368  |
| NM_001159633 | Slc44a1       | 2.016 | 1.546E-03 | 0  | 0 | 38414  | 0 | 0 | 0 | 1343  | 8483   |
| NM_022029    | Nrgn          | 3.444 | 1.697E-03 | -1 | 0 | 22256  | 0 | 1 | 0 | 829   | 4105   |
| NM_001113527 | lsg20         | 3.182 | 1.697E-03 | -1 | 0 | 290991 | 0 | 0 | 0 | 291   | 15792  |
| NM_025508    | Gmpr          | 1.442 | 1.764E-03 | 0  | 0 | 51714  | 0 | 1 | 0 | 21    | 12936  |
| NM_011708    | Vwf           | 4.146 | 1.811E-03 | -1 | 1 | 12602  | 0 | 0 | 0 | 51    | 133    |
| NM_138583    | D16H22S680E   | 1.089 | 1.827E-03 | 0  | 1 | 551    | 0 | 0 | 0 | 11    | 1492   |
| NM_134133    | 2010002N04Rik | 2.688 | 1.827E-03 | -1 | 1 | 540    | 1 | 1 | 1 | 514   | 418    |
| NM_008615    | LOC677317     | 1.751 | 1.875E-03 | 0  | 0 | 109125 | 1 | 0 | 1 | 72016 | 47412  |
| NM_026617    | Tmbim4        | 1.451 | 1.949E-03 | -1 | 1 | 128    | 0 | 1 | 1 | 89    | 132    |
| NM_009303    | Syng1         | 1.321 | 1.949E-03 | 0  | 1 | 7810   | 1 | 1 | 0 | 7688  | 9052   |
| NM_008185    | Gstt1         | 4.322 | 1.949E-03 | 0  | 0 | 244284 | 1 | 0 | 0 | 33701 | 2787   |
| NM_001032378 | Pecam1        | 1.595 | 2.077E-03 | -1 | 1 | 1047   | 0 | 0 | 0 | 11    | 4461   |
| NM_026178    | LOC100047565  | 1.782 | 2.077E-03 | -1 | 2 | 6408   | 0 | 1 | 0 | 356   | 23417  |
| NM_053149    | Hemgn         | 2.053 | 2.138E-03 | 0  | 0 | 159846 | 1 | 1 | 0 | 29    | 11956  |
| NM_018738    | Igtp          | 2.660 | 2.138E-03 | -1 | 2 | 5200   | 0 | 0 | 0 | 6088  | 13300  |
| NM_176848    | Fbxo2         | 4.745 | 2.199E-03 | -1 | 1 | 4500   | 0 | 0 | 0 | 543   | 31875  |
| NM_021430    | Rilpl1        | 1.566 | 2.199E-03 | 0  | 0 | 55979  | 1 | 1 | 1 | 1499  | 9029   |
| NM_001168256 | Tmem40        | 2.184 | 2.267E-03 | -1 | 2 | 2895   | 0 | 0 | 0 | 470   | 3247   |
| NM_001025364 | Rtn2          | 3.344 | 2.267E-03 | 0  | 0 | 23809  | 0 | 1 | 0 | 4853  | 19194  |
| NM_019985    | Clec1b        | 4.831 | 2.289E-03 | -1 | 2 | 8969   | 0 | 1 | 0 | 16    | 10948  |
| NM_009450    | Tubb2a        | 1.323 | 2.289E-03 | 0  | 1 | 14     | 0 | 1 | 0 | 7     | 11482  |
| NM_008207    | H2-T24        | 2.945 | 2.289E-03 | -1 | 1 | 18475  | 0 | 1 | 0 | 142   | 41330  |
| NM_175414    | Tspan9        | 2.714 | 2.289E-03 | -1 | 0 | 40862  | 0 | 1 | 0 | 6364  | 173739 |
| NM_001145801 | Ctla2b        | 3.047 | 2.351E-03 | -1 | 1 | 138    | 0 | 1 | 0 | 78    | 39271  |
| NM_001048207 | Gypc          | 1.598 | 2.381E-03 | 0  | 0 | 105584 | 0 | 0 | 0 | 9     | 7982   |
| NM_019932    | Pf4           | 1.294 | 2.420E-03 | 0  | 3 | 327    | 0 | 0 | 0 | 8     | 22     |
| NM_026527    | Chac2         | 1.797 | 2.462E-03 | -1 | 0 | 170850 | 0 | 1 | 0 | 139   | 15832  |
| NM_134076    | Abhd4         | 1.357 | 2.462E-03 | 0  | 3 | 668    | 0 | 0 | 0 | 5181  | 5195   |
| NM_001001999 | Gp1bb         | 1.331 | 2.469E-03 | 0  | 0 | 32500  | 0 | 0 | 0 | 675   | 2749   |
| NM_144520    | Sec14l2       | 2.663 | 2.746E-03 | 0  | 0 | 114172 | 0 | 1 | 0 | 1041  | 968    |
| NM_001109991 | Col18a1       | 3.024 | 2.791E-03 | 0  | 0 | 93042  | 0 | 1 | 0 | 17036 | 33221  |

|              |               |       |           |    |   |        |   |   |   |       |       |
|--------------|---------------|-------|-----------|----|---|--------|---|---|---|-------|-------|
| NM_001163574 | Tjp1          | 2.434 | 2.908E-03 | 0  | 0 | 343279 | 0 | 0 | 0 | 153   | 2318  |
| NM_026849    | Mtmr14        | 1.079 | 2.908E-03 | -1 | 0 | 89648  | 0 | 0 | 0 | 62    | 12743 |
| NM_027763    | Trem1         | 3.640 | 2.952E-03 | -1 | 0 | 60555  | 0 | 0 | 0 | 748   | 694   |
| NM_001163704 | Fbxo6         | 1.301 | 2.954E-03 | 0  | 1 | 4241   | 0 | 0 | 0 | 119   | 40617 |
| NM_025661    | Ormdl3        | 2.179 | 2.975E-03 | 0  | 0 | 84821  | 0 | 0 | 0 | 1     | 324   |
| NM_029934    | Mboat7        | 1.130 | 2.975E-03 | 0  | 0 | 443382 | 0 | 1 | 0 | 31    | 1176  |
| NM_133687    | Cxxc5         | 1.164 | 2.975E-03 | 0  | 0 | 64226  | 1 | 0 | 0 | 1244  | 1157  |
| NM_172753    | Csgalnact1    | 1.423 | 2.975E-03 | -1 | 0 | 173741 | 0 | 0 | 0 | 13307 | 5287  |
| NM_018804    | Syt11         | 2.403 | 2.975E-03 | 0  | 0 | 54592  | 1 | 0 | 0 | 14504 | 44174 |
| NM_026418    | Rgs10         | 2.114 | 3.000E-03 | 0  | 1 | 14843  | 0 | 1 | 0 | 3475  | 27810 |
| NM_001145959 | Ndrp2         | 2.260 | 3.043E-03 | -1 | 1 | 1753   | 0 | 1 | 0 | 26    | 6379  |
| NM_010326    | Gp1ba         | 3.714 | 3.043E-03 | -1 | 1 | 22     | 0 | 1 | 1 | 71    | 176   |
| NM_001130412 | Lpin1         | 1.160 | 3.043E-03 | 0  | 0 | 263772 | 0 | 0 | 0 | 1813  | 6882  |
| NM_019699    | Fads2         | 1.532 | 3.043E-03 | 0  | 0 | 72142  | 1 | 0 | 0 | 337   | 175   |
| NM_010170    | F2r12         | 2.795 | 3.043E-03 | -1 | 2 | 180    | 0 | 0 | 1 | 1143  | 111   |
| NM_001040654 | Cdkn2a        | 2.913 | 3.043E-03 | 0  | 0 | 46040  | 0 | 0 | 0 | 3458  | 9627  |
| NM_029219    | Rnf19b        | 1.988 | 3.043E-03 | -1 | 1 | 9929   | 0 | 0 | 0 | 9031  | 78    |
| NM_053195    | Slc24a3       | 2.718 | 3.332E-03 | -1 | 0 | 45897  | 0 | 0 | 0 | 8533  | 37217 |
| NM_173006    | Pon3          | 1.629 | 3.357E-03 | 0  | 0 | 186588 | 0 | 0 | 0 | 24    | 26437 |
| NR_015608    | 1810058I24Rik | 1.459 | 3.429E-03 | 0  | 0 | 132629 | 0 | 0 | 0 | 29    | 332   |
| NM_008681    | Ndrp1         | 1.873 | 3.429E-03 | -1 | 1 | 12499  | 0 | 0 | 0 | 422   | 24604 |
| NM_008967    | Ptgir         | 2.896 | 3.429E-03 | -1 | 2 | 673    | 0 | 0 | 0 | 2044  | 9426  |
| NM_145148    | Frmd4b        | 2.017 | 3.429E-03 | -1 | 0 | 207532 | 0 | 1 | 0 | 86426 | 3984  |
| NM_001170911 | Prr13         | 1.330 | 3.433E-03 | -1 | 1 | 1981   | 0 | 1 | 0 | 63    | 997   |
| NM_011734    | Siae          | 0.873 | 3.433E-03 | 0  | 0 | 83357  | 0 | 1 | 0 | 86    | 124   |
| NR_003513    | Neat1         | 2.038 | 3.433E-03 | -1 | 6 | 58     | 0 | 0 | 1 | 1221  | 215   |
| NM_172507    | Sh3bgrl2      | 3.154 | 3.433E-03 | -1 | 2 | 1831   | 0 | 1 | 0 | 1794  | 19981 |
| NM_007976    | F5            | 2.791 | 3.433E-03 | -1 | 2 | 13861  | 0 | 0 | 0 | 2632  | 1738  |
| NM_172647    | F11r          | 1.538 | 3.433E-03 | 0  | 0 | 56659  | 0 | 0 | 0 | 4047  | 2896  |
| NM_001081050 | Pard3b        | 1.817 | 3.433E-03 | -1 | 0 | 108465 | 0 | 0 | 0 | 8758  | 3100  |
| NM_010394    | H2-Q7         | 2.496 | 3.433E-03 | 0  | 0 | 137243 | 0 | 0 | 0 | 77900 | 99646 |
| NM_011385    | Ski           | 1.003 | 3.598E-03 | 0  | 0 | 82141  | 0 | 0 | 0 | 948   | 929   |

|              |           |       |           |    |   |        |   |   |   |        |       |
|--------------|-----------|-------|-----------|----|---|--------|---|---|---|--------|-------|
| NM_197986    | Tmem140   | 3.601 | 3.600E-03 | 0  | 1 | 6481   | 1 | 1 | 0 | 28     | 11564 |
| NM_023275    | Rhoj      | 2.379 | 3.600E-03 | -1 | 1 | 16554  | 0 | 0 | 0 | 11     | 4502  |
| NM_018810    | Mkrm1     | 2.253 | 3.600E-03 | -1 | 3 | 4342   | 0 | 0 | 0 | 65     | 5203  |
| NM_053090    | Fam126a   | 1.492 | 3.600E-03 | -1 | 0 | 23248  | 0 | 0 | 0 | 24     | 57    |
| NM_026432    | Tmem66    | 0.862 | 3.600E-03 | 0  | 2 | 22     | 1 | 1 | 0 | 27     | 2174  |
| NM_011401    | Slc2a3    | 2.505 | 3.600E-03 | -1 | 1 | 16171  | 0 | 1 | 1 | 42     | 52    |
| NM_008397    | Itga6     | 1.925 | 3.600E-03 | 0  | 1 | 4088   | 0 | 0 | 0 | 156    | 8776  |
| NM_011539    | Tbxas1    | 2.614 | 3.600E-03 | -1 | 2 | 43     | 1 | 1 | 0 | 81     | 5770  |
| NM_016780    | Itgb3     | 3.005 | 3.600E-03 | -1 | 1 | 3771   | 0 | 1 | 1 | 95     | 373   |
| NM_010941    | Nsdhl     | 1.121 | 3.600E-03 | 0  | 0 | 422700 | 0 | 0 | 0 | 523    | 29860 |
| NM_178869    | Ttll1     | 1.065 | 3.600E-03 | 0  | 1 | 15583  | 0 | 0 | 0 | 53     | 75431 |
| NM_029688    | Srxn1     | 1.747 | 3.600E-03 | -1 | 1 | 284    | 1 | 1 | 0 | 210    | 11850 |
| NM_001083922 | Wbp1      | 0.762 | 3.600E-03 | 0  | 0 | 93723  | 0 | 0 | 0 | 378    | 5932  |
| NM_001111049 | Cd151     | 1.383 | 3.600E-03 | 0  | 1 | 1654   | 0 | 1 | 0 | 1686   | 73495 |
| NM_008871    | Serpine1  | 2.535 | 3.600E-03 | 1  | 0 | 30884  | 1 | 1 | 1 | 4049   | 3467  |
| NM_029465    | Clec4g    | 1.330 | 3.600E-03 | -1 | 0 | 307587 | 0 | 0 | 0 | 8783   | 4421  |
| NM_023279    | Tubb3     | 4.725 | 3.600E-03 | -1 | 1 | 1335   | 0 | 0 | 0 | 37194  | 5336  |
| NM_007642    | Cd28      | 1.760 | 3.600E-03 | -1 | 0 | 114384 | 0 | 0 | 0 | 43608  | 25496 |
| NM_027127    | Gpx8      | 1.298 | 3.600E-03 | 0  | 0 | 371979 | 0 | 1 | 0 | 55782  | 11229 |
| NM_001048054 | Dusp16    | 1.235 | 3.610E-03 | 0  | 0 | 38977  | 0 | 0 | 0 | 12     | 1635  |
| NM_008148    | Gp5       | 3.200 | 3.610E-03 | -1 | 1 | 19     | 0 | 1 | 0 | 70     | 5076  |
| NM_023738    | Uba7      | 1.916 | 3.621E-03 | 0  | 1 | 12562  | 0 | 0 | 0 | 84     | 7330  |
| NM_001159301 | Lgals9    | 1.606 | 3.621E-03 | 0  | 0 | 66561  | 0 | 1 | 1 | 35     | 3820  |
| NM_001081490 | Fbxo9     | 0.816 | 3.630E-03 | 0  | 1 | 14     | 0 | 1 | 0 | 41     | 7238  |
| NM_009894    | Cideb     | 1.529 | 3.630E-03 | 0  | 0 | 34867  | 0 | 0 | 0 | 688    | 19931 |
| NM_007791    | Csrp1     | 0.866 | 3.630E-03 | 0  | 0 | 91527  | 0 | 1 | 0 | 78     | 6076  |
| NM_133167    | LOC676024 | 1.835 | 3.631E-03 | -1 | 1 | 4397   | 0 | 0 | 0 | 1184   | 3815  |
| NM_024233    | Rexo2     | 0.822 | 3.631E-03 | 0  | 0 | 123387 | 0 | 1 | 0 | 14772  | 7038  |
| NM_019983    | Rabgef1   | 1.225 | 3.681E-03 | 0  | 1 | 15573  | 0 | 1 | 1 | 15490  | 1730  |
| NM_001113419 | Schip1    | 1.144 | 3.681E-03 | 0  | 0 | 246244 | 0 | 1 | 0 | 246239 | 8159  |
| NM_007609    | Casp4     | 1.373 | 3.742E-03 | -1 | 1 | 9657   | 0 | 0 | 0 | 113    | 62175 |
| NM_001033167 | Slc22a23  | 3.042 | 3.742E-03 | -1 | 3 | 3555   | 1 | 1 | 0 | 3489   | 801   |

|              |          |       |           |    |   |         |   |   |   |        |       |
|--------------|----------|-------|-----------|----|---|---------|---|---|---|--------|-------|
| NM_009375    | Tg       | 3.408 | 3.742E-03 | -1 | 0 | 102821  | 0 | 1 | 0 | 14107  | 30523 |
| NM_001161420 | Vldlr    | 2.815 | 3.742E-03 | 0  | 0 | 89832   | 0 | 0 | 0 | 67295  | 29621 |
| NM_023785    | Ppbbp    | 3.775 | 3.875E-03 | 0  | 3 | 3589    | 0 | 0 | 0 | 2119   | 3894  |
| NM_001136484 | Gcnt1    | 1.436 | 3.913E-03 | -1 | 1 | 4316    | 0 | 1 | 1 | 180    | 4250  |
| NM_001145799 | Ctla2a   | 2.471 | 3.913E-03 | -1 | 2 | 212     | 0 | 1 | 1 | 98     | 152   |
| NM_139269    | Pla2g16  | 1.711 | 3.945E-03 | 0  | 1 | 74      | 0 | 0 | 0 | 23823  | 4742  |
| NM_134250    | Havcr2   | 2.872 | 4.177E-03 | -1 | 1 | 141     | 0 | 1 | 0 | 128    | 7126  |
| NM_001136062 | Eno3     | 1.086 | 4.277E-03 | 0  | 1 | 18068   | 0 | 1 | 1 | 3624   | 2714  |
| NM_001110275 | Itsn1    | 1.592 | 4.286E-03 | -1 | 0 | 60451   | 0 | 1 | 1 | 616    | 89    |
| NM_001130188 | Sgce     | 1.809 | 4.294E-03 | -1 | 0 | 31490   | 0 | 0 | 0 | 135142 | 28705 |
| NM_001111099 | Cdkn1a   | 1.372 | 4.296E-03 | 0  | 2 | 4587    | 0 | 1 | 0 | 4596   | 11713 |
| NM_033612    | Cela1    | 1.926 | 4.308E-03 | -1 | 2 | 13803   | 0 | 1 | 1 | 744    | 13911 |
| NM_001166377 | Armcx1   | 2.617 | 4.333E-03 | 0  | 0 | 65598   | 0 | 1 | 0 | 192    | 25792 |
| NM_008702    | Nlk      | 1.291 | 4.333E-03 | -1 | 0 | 96703   | 0 | 0 | 0 | 91     | 13637 |
| NM_008771    | P2rx1    | 1.781 | 4.333E-03 | 0  | 0 | 39846   | 0 | 0 | 0 | 225    | 172   |
| NM_009250    | Serpini1 | 2.314 | 4.333E-03 | -1 | 0 | 135710  | 0 | 0 | 0 | 648    | 372   |
| NM_144521    | Snap47   | 0.889 | 4.333E-03 | 0  | 0 | 31070   | 0 | 1 | 0 | 28334  | 28309 |
| NM_011563    | Prdx2    | 0.782 | 4.417E-03 | 0  | 0 | 55535   | 1 | 0 | 0 | 2801   | 6978  |
| NM_001111073 | Fxyd5    | 0.695 | 4.424E-03 | 0  | 0 | 622167  | 0 | 1 | 0 | 352    | 15202 |
| NM_001172099 | Cuedc1   | 1.738 | 4.424E-03 | -1 | 1 | 7255    | 0 | 1 | 1 | 5026   | 5076  |
| NM_145925    | Pttg1ip  | 1.502 | 4.460E-03 | -1 | 2 | 2483    | 0 | 0 | 0 | 2067   | 2112  |
| NM_001037098 | Nacc2    | 1.814 | 4.460E-03 | 0  | 0 | 24030   | 1 | 0 | 1 | 5301   | 531   |
| NM_146094    | Fads1    | 0.909 | 4.460E-03 | 0  | 1 | 9241    | 1 | 0 | 0 | 5549   | 244   |
| NM_001025613 | Otud7b   | 2.498 | 4.523E-03 | -1 | 0 | 40108   | 0 | 0 | 0 | 9      | 32    |
| NM_001113460 | Tec      | 1.689 | 4.570E-03 | -1 | 3 | 4854    | 0 | 1 | 0 | 316    | 506   |
| NM_009908    | Cmas     | 1.641 | 4.583E-03 | 0  | 1 | 616     | 1 | 0 | 0 | 1024   | 47855 |
| NM_007553    | Bmp2     | 2.248 | 4.587E-03 | -1 | 0 | 39443   | 0 | 0 | 0 | 55228  | 1541  |
| NM_019819    | Dusp14   | 3.440 | 4.632E-03 | -1 | 0 | 164856  | 0 | 0 | 0 | 5359   | 61204 |
| NM_011449    | Spa17    | 1.400 | 4.654E-03 | -1 | 0 | 83125   | 0 | 1 | 0 | 145    | 107   |
| NM_019418    | Tnfsf14  | 2.667 | 4.704E-03 | -1 | 2 | 784     | 0 | 0 | 0 | 66     | 22861 |
| NM_133911    | Gpr125   | 0.955 | 4.704E-03 | 0  | 0 | 1656891 | 0 | 0 | 0 | 111    | 18620 |
| NM_019549    | Plek     | 2.170 | 4.719E-03 | 0  | 1 | 3622    | 0 | 1 | 1 | 83     | 3491  |



|              |               |       |           |    |   |        |   |   |   |        |        |
|--------------|---------------|-------|-----------|----|---|--------|---|---|---|--------|--------|
| NM_011596    | Atp6v0a2      | 0.991 | 4.719E-03 | 0  | 0 | 154226 | 1 | 1 | 1 | 65     | 27     |
| NM_009105    | Rsu1          | 1.342 | 4.719E-03 | 0  | 1 | 6299   | 0 | 0 | 0 | 92     | 2730   |
| NM_025572    | 2610528J11Rik | 2.906 | 4.719E-03 | -1 | 0 | 25740  | 0 | 0 | 0 | 10309  | 11506  |
| NM_013792    | Naglu         | 1.112 | 4.722E-03 | 0  | 2 | 6202   | 0 | 1 | 0 | 143    | 44788  |
| NM_019547    | Rbm38         | 1.048 | 4.795E-03 | 0  | 1 | 16330  | 1 | 1 | 0 | 21     | 23     |
| NM_028127    | Frmd6         | 0.977 | 4.795E-03 | 0  | 0 | 149466 | 0 | 1 | 0 | 62     | 3045   |
| NR_033498    | AI504432      | 1.965 | 4.795E-03 | -1 | 0 | 546588 | 0 | 1 | 0 | 1212   | 244    |
| NM_030700    | LOC100046560  | 1.220 | 4.836E-03 | 0  | 0 | 856569 | 0 | 0 | 0 | 685    | 16975  |
| NM_001163310 | Rit1          | 1.040 | 4.836E-03 | -1 | 1 | 1153   | 1 | 0 | 0 | 286    | 11358  |
| NM_008640    | Laptm4a       | 0.708 | 4.836E-03 | 0  | 0 | 399665 | 0 | 1 | 0 | 574    | 69171  |
| NM_001033189 | C77080        | 0.884 | 4.836E-03 | 1  | 1 | 15162  | 1 | 1 | 0 | 8196   | 8103   |
| NM_011527    | Tal1          | 1.707 | 4.871E-03 | 0  | 1 | 2143   | 0 | 0 | 0 | 478    | 1489   |
| NM_016867    | Gipc2         | 1.751 | 4.968E-03 | 0  | 0 | 38371  | 0 | 0 | 0 | 5540   | 2871   |
| NM_011817    | Gadd45g       | 2.468 | 5.012E-03 | 0  | 1 | 1577   | 0 | 0 | 0 | 38     | 132    |
| NM_133697    | 1110003E01Rik | 1.595 | 5.012E-03 | 0  | 0 | 46157  | 0 | 0 | 0 | 199    | 59     |
| NM_001135657 | Ptprj         | 1.213 | 5.012E-03 | -1 | 0 | 76937  | 0 | 0 | 0 | 9918   | 18907  |
| NM_008135    | Slc6a9        | 0.743 | 5.054E-03 | 0  | 0 | 117641 | 0 | 0 | 0 | 345    | 1030   |
| NM_001038015 | Gnpda2        | 0.791 | 5.054E-03 | 0  | 1 | 8274   | 0 | 0 | 0 | 35393  | 136019 |
| NM_018882    | Gpr56         | 1.673 | 5.056E-03 | 0  | 3 | 73     | 0 | 0 | 0 | 945    | 14202  |
| NM_008287    | Hrsp12        | 1.673 | 5.056E-03 | 0  | 2 | 2300   | 0 | 1 | 0 | 2367   | 325    |
| NM_018869    | Grk5          | 1.346 | 5.120E-03 | -1 | 0 | 50464  | 0 | 1 | 0 | 506    | 56460  |
| NM_001142916 | Plod2         | 0.889 | 5.136E-03 | 0  | 0 | 54867  | 0 | 0 | 0 | 167128 | 10254  |
| NM_019440    | Irgm2         | 2.384 | 5.158E-03 | -1 | 1 | 3498   | 0 | 0 | 0 | 124    | 9449   |
| NM_001038700 | Fnbp1         | 0.715 | 5.235E-03 | 0  | 3 | 6043   | 0 | 0 | 0 | 68     | 3009   |
| NM_021454    | Cdc42ep5      | 1.474 | 5.303E-03 | -1 | 0 | 27791  | 0 | 1 | 0 | 59     | 56903  |
| NM_001109045 | Aqp8          | 1.763 | 5.303E-03 | 0  | 0 | 124975 | 0 | 0 | 0 | 63193  | 77085  |
| NM_011597    | Tjp2          | 0.971 | 5.311E-03 | 0  | 0 | 58492  | 0 | 1 | 0 | 106    | 39520  |
| NM_080555    | Ppap2b        | 2.225 | 5.311E-03 | 0  | 0 | 50542  | 0 | 0 | 0 | 5599   | 25688  |
| NM_026272    | Narf          | 1.246 | 5.473E-03 | 0  | 0 | 91185  | 0 | 0 | 0 | 6      | 9024   |
| NM_001164248 | Tpm1          | 0.884 | 5.473E-03 | 0  | 1 | 11291  | 0 | 0 | 0 | 5405   | 5434   |
| NM_138651    | Cds2          | 1.225 | 5.473E-03 | 0  | 1 | 6148   | 0 | 1 | 0 | 6079   | 10417  |
| NM_025797    | Cyb5          | 1.091 | 5.625E-03 | 0  | 2 | 2294   | 1 | 1 | 0 | 2319   | 26503  |

|              |               |       |           |    |   |         |   |   |   |        |       |
|--------------|---------------|-------|-----------|----|---|---------|---|---|---|--------|-------|
| NM_001172154 | Dnase111      | 1.212 | 5.839E-03 | -1 | 0 | 143053  | 1 | 0 | 0 | 357    | 23264 |
| NM_011804    | Creg1         | 1.442 | 5.839E-03 | 0  | 2 | 80      | 0 | 0 | 0 | 419    | 2640  |
| NM_011815    | Fyb           | 2.005 | 5.904E-03 | -1 | 1 | 10472   | 0 | 1 | 0 | 5114   | 5092  |
| NM_009808    | Casp12        | 2.912 | 5.907E-03 | -1 | 1 | 2337    | 0 | 1 | 0 | 2099   | 25559 |
| NM_010184    | Fcer1a        | 3.050 | 5.926E-03 | -1 | 0 | 64031   | 0 | 0 | 0 | 102136 | 25033 |
| NM_013730    | Slamf1        | 2.601 | 6.057E-03 | -1 | 1 | 5130    | 0 | 1 | 0 | 51     | 114   |
| NM_030024    | Prr15         | 1.379 | 6.057E-03 | 0  | 0 | 166147  | 0 | 1 | 0 | 853    | 26522 |
| NM_001033210 | Pls1          | 3.521 | 6.057E-03 | -1 | 1 | 17992   | 0 | 1 | 0 | 12281  | 307   |
| NM_011633    | Traf5         | 1.561 | 6.057E-03 | 0  | 0 | 80001   | 0 | 0 | 0 | 13916  | 21083 |
| NM_012048    | Polk          | 0.903 | 6.088E-03 | 0  | 0 | 138973  | 0 | 0 | 0 | 53     | 70    |
| NM_173742    | Rnasek        | 1.195 | 6.088E-03 | 0  | 1 | 10490   | 0 | 1 | 0 | 236    | 2014  |
| NM_153781    | Pygb          | 0.821 | 6.088E-03 | -1 | 1 | 13985   | 0 | 1 | 0 | 63     | 14317 |
| NM_016916    | Blcap         | 1.103 | 6.088E-03 | 0  | 1 | 1038    | 0 | 0 | 0 | 385    | 24867 |
| NM_001047435 | Pard6a        | 0.686 | 6.088E-03 | 0  | 0 | 50261   | 0 | 1 | 0 | 546    | 371   |
| NM_010282    | Ggps1         | 0.647 | 6.088E-03 | 0  | 1 | 12139   | 0 | 0 | 0 | 733    | 7209  |
| NM_133655    | Cd81          | 1.210 | 6.088E-03 | 0  | 1 | 9551    | 0 | 1 | 0 | 3281   | 13026 |
| NM_021381    | Prokr1        | 1.750 | 6.088E-03 | -1 | 1 | 7189    | 0 | 1 | 0 | 6605   | 2526  |
| NM_010689    | Lat           | 1.914 | 6.110E-03 | 0  | 0 | 52410   | 0 | 1 | 0 | 18     | 1996  |
| NM_010575    | Itga2b        | 2.707 | 6.122E-03 | 0  | 0 | 24335   | 0 | 1 | 0 | 300    | 359   |
| NM_013610    | Ninj1         | 0.982 | 6.132E-03 | 0  | 2 | 2608    | 0 | 1 | 0 | 564    | 518   |
| NM_011170    | Prnp          | 2.294 | 6.243E-03 | 0  | 0 | 25972   | 0 | 0 | 0 | 96     | 21448 |
| NM_016754    | Mylpf         | 1.015 | 6.285E-03 | -1 | 1 | 7413    | 0 | 0 | 0 | 384    | 2908  |
| NM_025944    | 2810432L12Rik | 1.717 | 6.285E-03 | 0  | 0 | 339788  | 0 | 0 | 0 | 326    | 733   |
| NM_001122739 | Inpp1         | 0.799 | 6.285E-03 | 0  | 0 | 23389   | 0 | 0 | 0 | 476    | 454   |
| NM_001038695 | Kdm3a         | 0.703 | 6.285E-03 | 0  | 0 | 104633  | 0 | 1 | 0 | 498    | 79    |
| NR_003368    | Pvt1          | 0.656 | 6.285E-03 | 0  | 0 | 26582   | 0 | 0 | 0 | 8459   | 12338 |
| NM_145602    | Ndr4          | 2.727 | 6.285E-03 | -1 | 0 | 149444  | 0 | 1 | 0 | 12839  | 8294  |
| NM_030595    | Nbea          | 2.429 | 6.285E-03 | 0  | 0 | 56194   | 1 | 0 | 0 | 116842 | 7329  |
| NM_007901    | S1pr1         | 0.893 | 6.290E-03 | 0  | 0 | 25415   | 0 | 1 | 1 | 36     | 20090 |
| NM_013690    | Tek           | 1.944 | 6.367E-03 | 0  | 0 | 136059  | 0 | 1 | 0 | 29595  | 42937 |
| NM_009906    | Tpp1          | 0.897 | 6.382E-03 | 0  | 0 | 1321042 | 0 | 0 | 0 | 669    | 58703 |
| NM_001171052 | Mta3          | 0.926 | 6.382E-03 | 0  | 0 | 26116   | 1 | 1 | 1 | 649    | 53    |

|              |              |       |           |    |   |        |   |   |   |       |        |
|--------------|--------------|-------|-----------|----|---|--------|---|---|---|-------|--------|
| NM_001111060 | Cd59a        | 2.305 | 6.382E-03 | 0  | 0 | 50347  | 1 | 1 | 0 | 2829  | 64     |
| NM_001109761 | Capn3        | 2.294 | 6.382E-03 | -1 | 0 | 76043  | 0 | 0 | 0 | 7525  | 46627  |
| NM_008969    | Ptgs1        | 1.317 | 6.640E-03 | 0  | 0 | 29105  | 0 | 1 | 0 | 661   | 19940  |
| NM_009551    | Zfand5       | 1.114 | 6.651E-03 | -1 | 2 | 702    | 0 | 1 | 0 | 431   | 6243   |
| NM_001159883 | Dnajb2       | 1.896 | 6.651E-03 | -1 | 1 | 17680  | 1 | 0 | 0 | 7104  | 19552  |
| NM_007635    | Ccng2        | 0.734 | 6.713E-03 | -1 | 0 | 38118  | 0 | 0 | 0 | 642   | 27419  |
| NM_010165    | Eya2         | 2.224 | 6.831E-03 | -1 | 0 | 22026  | 0 | 0 | 0 | 109   | 5115   |
| NM_027230    | Zmynd8       | 1.048 | 6.845E-03 | 0  | 1 | 669    | 1 | 1 | 0 | 936   | 4071   |
| NM_021897    | Trp53inp1    | 0.736 | 6.927E-03 | 0  | 0 | 67637  | 1 | 0 | 0 | 285   | 4      |
| NM_053267    | Selm         | 0.753 | 6.961E-03 | 0  | 0 | 718200 | 0 | 1 | 0 | 20876 | 6480   |
| NM_001166642 | Bcas3        | 0.937 | 6.969E-03 | 0  | 0 | 26144  | 0 | 0 | 0 | 4     | 142    |
| NM_133983    | Cd276        | 1.306 | 6.969E-03 | 0  | 1 | 1106   | 0 | 1 | 0 | 1039  | 1607   |
| NM_020590    | Gabarapl1    | 1.251 | 6.969E-03 | 0  | 2 | 488    | 0 | 0 | 0 | 1090  | 63278  |
| NM_001001491 | Tpm4         | 1.849 | 6.969E-03 | 0  | 1 | 9281   | 0 | 0 | 0 | 1557  | 1769   |
| NM_023456    | Npy          | 4.860 | 6.969E-03 | -1 | 0 | 34269  | 0 | 0 | 0 | 16000 | 107398 |
| NM_021347    | Gsdma        | 1.013 | 6.969E-03 | 0  | 1 | 7716   | 0 | 0 | 0 | 18168 | 18227  |
| NM_145575    | Cald1        | 2.377 | 7.194E-03 | 0  | 0 | 27644  | 0 | 0 | 0 | 34890 | 3912   |
| NM_009506    | Vegfc        | 1.666 | 7.196E-03 | 0  | 0 | 44608  | 0 | 1 | 0 | 12    | 12396  |
| NM_008772    | P2ry1        | 2.565 | 7.233E-03 | 0  | 0 | 69802  | 0 | 0 | 0 | 12    | 54     |
| NM_026004    | Nt5c3        | 1.602 | 7.233E-03 | -1 | 2 | 4375   | 0 | 1 | 0 | 75    | 153    |
| NM_009344    | Phlda1       | 1.704 | 7.316E-03 | 0  | 1 | 1532   | 0 | 0 | 0 | 184   | 1068   |
| NM_008928    | Map2k3       | 0.605 | 7.453E-03 | 0  | 1 | 3499   | 1 | 1 | 0 | 81    | 62     |
| NM_001037741 | Gpx4         | 0.821 | 7.453E-03 | 0  | 3 | 1796   | 0 | 0 | 0 | 483   | 55     |
| NM_011767    | Zfr          | 0.600 | 7.453E-03 | 0  | 0 | 109601 | 0 | 1 | 0 | 233   | 10692  |
| NM_145486    | LOC100044703 | 1.980 | 7.500E-03 | 0  | 0 | 88979  | 0 | 0 | 0 | 126   | 6526   |
| NM_153789    | Myliip       | 1.297 | 7.500E-03 | 0  | 0 | 66012  | 0 | 1 | 0 | 128   | 1395   |
| NM_008535    | Lyl1         | 0.599 | 7.500E-03 | 0  | 0 | 23937  | 0 | 0 | 0 | 1408  | 220    |
| NM_021537    | Stk25        | 1.067 | 7.532E-03 | -1 | 1 | 14045  | 0 | 0 | 0 | 1110  | 6531   |
| NM_019579    | Mpp5         | 0.941 | 7.553E-03 | 0  | 2 | 553    | 0 | 1 | 0 | 643   | 7621   |
| NM_172570    | Trim47       | 1.542 | 7.627E-03 | 0  | 1 | 5469   | 0 | 1 | 0 | 762   | 11818  |
| NM_016676    | Rab10        | 0.631 | 7.627E-03 | 0  | 0 | 24346  | 1 | 0 | 0 | 230   | 5057   |
| NM_021878    | Jarid2       | 1.248 | 7.632E-03 | 0  | 0 | 281307 | 0 | 0 | 0 | 202   | 1017   |

|              |               |       |           |    |   |        |   |   |   |       |       |
|--------------|---------------|-------|-----------|----|---|--------|---|---|---|-------|-------|
| NM_016672    | Ddc           | 2.722 | 7.790E-03 | 0  | 1 | 1178   | 0 | 1 | 0 | 1169  | 17630 |
| NM_025480    | Tmem128       | 0.711 | 7.866E-03 | 0  | 0 | 239906 | 1 | 0 | 0 | 26    | 81    |
| NM_177876    | Vps37b        | 0.898 | 7.904E-03 | 0  | 1 | 4698   | 0 | 1 | 0 | 31    | 47    |
| NM_010149    | Epor          | 1.435 | 7.904E-03 | 0  | 0 | 39359  | 0 | 1 | 1 | 904   | 928   |
| NM_001128606 | Epb4.1        | 1.209 | 7.984E-03 | 0  | 1 | 18831  | 1 | 1 | 0 | 5705  | 327   |
| NM_010815    | Grap2         | 2.060 | 8.010E-03 | 0  | 2 | 15803  | 0 | 1 | 0 | 164   | 12836 |
| NM_009599    | Ache          | 1.956 | 8.010E-03 | 0  | 0 | 96500  | 1 | 1 | 0 | 731   | 6189  |
| NM_026441    | Pef1          | 0.712 | 8.010E-03 | 0  | 1 | 4934   | 1 | 0 | 0 | 39    | 343   |
| NM_024495    | Car13         | 1.066 | 8.010E-03 | 0  | 0 | 424159 | 0 | 0 | 0 | 135   | 1861  |
| NM_001002267 | Tmem158       | 1.908 | 8.010E-03 | -1 | 1 | 14818  | 0 | 1 | 0 | 10945 | 1050  |
| NM_001077696 | Hdac5         | 0.711 | 8.024E-03 | 0  | 0 | 54947  | 0 | 0 | 0 | 81    | 40    |
| NM_021880    | Prkar1a       | 0.728 | 8.096E-03 | 0  | 0 | 177127 | 0 | 1 | 0 | 23    | 15045 |
| NM_172691    | B230312A22Rik | 1.383 | 8.096E-03 | -1 | 0 | 59595  | 0 | 0 | 0 | 1167  | 431   |
| NM_001005608 | Itgb4         | 0.780 | 8.096E-03 | 0  | 0 | 49189  | 0 | 1 | 1 | 29896 | 8278  |
| NM_011653    | Gm3756        | 0.862 | 8.113E-03 | 0  | 0 | 76228  | 0 | 0 | 0 | 143   | 35092 |
| NM_021428    | Dexi          | 0.596 | 8.113E-03 | 0  | 0 | 133879 | 0 | 1 | 0 | 2170  | 562   |
| NM_010228    | Flt1          | 1.560 | 8.113E-03 | 0  | 0 | 135197 | 0 | 0 | 0 | 4394  | 4252  |
| NM_008398    | Itga7         | 0.823 | 8.113E-03 | 0  | 1 | 2597   | 0 | 0 | 0 | 10754 | 6788  |
| NM_029083    | Ddit4         | 1.779 | 8.113E-03 | -1 | 0 | 49529  | 0 | 0 | 0 | 15839 | 51538 |
| NM_001177778 | Dlg3          | 0.917 | 8.113E-03 | 0  | 0 | 470635 | 0 | 0 | 0 | 46457 | 9063  |
| NM_026148    | Lims1         | 1.364 | 8.154E-03 | 0  | 0 | 23237  | 0 | 0 | 0 | 41    | 93    |
| NM_133234    | Bbc3          | 1.602 | 8.154E-03 | -1 | 0 | 31266  | 0 | 1 | 0 | 942   | 1268  |
| NM_054045    | Hist1h3a      | 4.257 | 8.280E-03 | -1 | 0 | 30444  | 0 | 1 | 0 | 1494  | 18328 |
| NR_030716    | 5430417L22Rik | 1.852 | 8.280E-03 | -1 | 0 | 86479  | 1 | 1 | 1 | 152   | 248   |
| NM_015806    | Mapk6         | 1.174 | 8.280E-03 | 0  | 0 | 46111  | 0 | 0 | 0 | 244   | 185   |
| NM_138656    | Mvd           | 0.944 | 8.280E-03 | 0  | 0 | 27658  | 0 | 0 | 0 | 202   | 18018 |
| NM_009624    | Adcy9         | 2.588 | 8.280E-03 | -1 | 0 | 46403  | 0 | 0 | 0 | 5100  | 805   |
| NM_001136065 | Hipk2         | 0.939 | 8.309E-03 | 0  | 1 | 6114   | 0 | 0 | 0 | 1936  | 8726  |
| NM_033144    | 8-Sep         | 1.121 | 8.329E-03 | 0  | 0 | 137287 | 0 | 0 | 1 | 952   | 53227 |
| NM_001122892 | Fyn           | 0.665 | 8.383E-03 | 0  | 0 | 95377  | 0 | 0 | 0 | 976   | 86    |
| NM_011580    | Thbs1         | 1.889 | 8.571E-03 | 0  | 0 | 45211  | 0 | 1 | 0 | 65    | 862   |
| NM_010311    | Gnaz          | 2.237 | 8.582E-03 | -1 | 0 | 136972 | 0 | 0 | 0 | 2892  | 2121  |

|              |               |       |           |    |   |         |   |   |   |        |       |
|--------------|---------------|-------|-----------|----|---|---------|---|---|---|--------|-------|
| NM_175133    | 1110038D17Rik | 0.737 | 8.803E-03 | 0  | 1 | 14383   | 0 | 0 | 0 | 590    | 12403 |
| NM_153795    | Fermt3        | 0.966 | 8.803E-03 | 0  | 1 | 946     | 0 | 0 | 0 | 1279   | 16    |
| NM_018854    | Ift20         | 0.594 | 8.870E-03 | -1 | 0 | 64286   | 0 | 0 | 0 | 107    | 24995 |
| NM_013586    | Loxl3         | 0.651 | 8.902E-03 | 0  | 1 | 19556   | 1 | 0 | 0 | 832    | 56390 |
| NM_008089    | Gata1         | 1.807 | 8.902E-03 | 0  | 0 | 32929   | 0 | 0 | 0 | 3515   | 7463  |
| NM_008719    | Npas2         | 1.477 | 9.144E-03 | -1 | 0 | 100808  | 0 | 0 | 0 | 1502   | 13133 |
| NM_026793    | Myct1         | 2.114 | 9.150E-03 | -1 | 0 | 22375   | 0 | 1 | 0 | 59     | 55    |
| NM_138677    | Edem1         | 0.993 | 9.150E-03 | -1 | 1 | 14143   | 0 | 0 | 0 | 106    | 984   |
| NM_001081212 | Irs2          | 2.348 | 9.150E-03 | -1 | 0 | 40527   | 0 | 0 | 0 | 1137   | 583   |
| NM_138602    | Prpf2         | 1.026 | 9.188E-03 | 0  | 0 | 37424   | 1 | 1 | 0 | 6630   | 8001  |
| NM_031877    | Wasf1         | 0.957 | 9.236E-03 | 0  | 0 | 35337   | 0 | 0 | 0 | 284    | 15    |
| NM_133858    | Fam63a        | 1.480 | 9.279E-03 | -1 | 1 | 10849   | 1 | 1 | 1 | 355    | 11021 |
| NM_001177833 | Smox          | 1.690 | 9.279E-03 | 0  | 0 | 48407   | 1 | 0 | 0 | 4681   | 62    |
| NM_008685    | Nfe2          | 0.921 | 9.285E-03 | -1 | 1 | 16779   | 0 | 0 | 0 | 21     | 2531  |
| NM_013589    | Ltbp2         | 2.402 | 9.285E-03 | 0  | 0 | 459215  | 1 | 1 | 0 | 21948  | 52179 |
| NM_009899    | Clca1         | 3.361 | 9.285E-03 | 0  | 0 | 72301   | 0 | 0 | 0 | 40268  | 54573 |
| NM_001033208 | Gcom1         | 1.449 | 9.286E-03 | 0  | 0 | 204752  | 0 | 0 | 0 | 14468  | 65112 |
| NM_011595    | Timp3         | 1.877 | 9.365E-03 | 0  | 0 | 246966  | 0 | 1 | 0 | 181    | 14532 |
| NM_024207    | Der1          | 1.183 | 9.365E-03 | -1 | 1 | 14428   | 1 | 1 | 0 | 54     | 849   |
| NM_001038999 | Atp8a1        | 1.239 | 9.365E-03 | -1 | 0 | 31473   | 0 | 0 | 0 | 216    | 335   |
| NM_001109992 | Ptpn11        | 0.946 | 9.365E-03 | 0  | 1 | 6048    | 0 | 0 | 0 | 81     | 11945 |
| NM_027102    | Esam          | 2.297 | 9.365E-03 | 0  | 2 | 2400    | 0 | 1 | 0 | 2271   | 4126  |
| NM_001111110 | Cmah          | 1.374 | 9.365E-03 | -1 | 0 | 58896   | 0 | 0 | 0 | 11001  | 21698 |
| NM_011347    | Selp          | 2.105 | 9.365E-03 | -1 | 2 | 11963   | 0 | 1 | 1 | 11845  | 11878 |
| NM_001025610 | Ms4a7         | 3.095 | 9.451E-03 | 1  | 0 | 265993  | 0 | 0 | 0 | 14     | 55894 |
| NM_028841    | Tspan17       | 1.389 | 9.618E-03 | 0  | 0 | 324667  | 0 | 0 | 0 | 174    | 23921 |
| NM_001172424 | Dhrs3         | 1.842 | 9.687E-03 | 0  | 0 | 23889   | 0 | 0 | 0 | 2776   | 2822  |
| NM_027324    | Sfxn1         | 0.589 | 9.687E-03 | 0  | 0 | 29458   | 0 | 1 | 0 | 9108   | 998   |
| NM_001039546 | Myo6          | 1.084 | 9.694E-03 | -1 | 0 | 1569060 | 0 | 0 | 0 | 43     | 526   |
| NM_011099    | Pkm2          | 0.589 | 9.694E-03 | 0  | 2 | 2625    | 0 | 0 | 0 | 265    | 189   |
| NM_001012306 | Hsd3b2        | 1.702 | 9.694E-03 | 0  | 0 | 94714   | 1 | 0 | 0 | 345817 | 84721 |
| NM_008783    | Pbx1          | 1.005 | 9.779E-03 | 0  | 1 | 14905   | 0 | 0 | 0 | 186    | 56441 |

|              |              |       |           |    |   |         |   |   |   |        |       |
|--------------|--------------|-------|-----------|----|---|---------|---|---|---|--------|-------|
| NM_008706    | Nqo1         | 2.023 | 9.910E-03 | 0  | 2 | 431     | 1 | 1 | 0 | 369    | 16320 |
| NM_001159536 | Adcy3        | 0.679 | 9.910E-03 | 0  | 1 | 5797    | 0 | 0 | 0 | 50818  | 13956 |
| NM_007975    | F2rl3        | 2.081 | 1.013E-02 | 0  | 0 | 78473   | 0 | 1 | 0 | 363    | 3124  |
| NM_007899    | Ecm1         | 2.174 | 1.015E-02 | 0  | 1 | 12615   | 0 | 0 | 0 | 18     | 23879 |
| NM_145619    | Parp3        | 0.990 | 1.023E-02 | 0  | 0 | 231116  | 0 | 0 | 0 | 442    | 9251  |
| NM_001163336 | Atp2a3       | 1.271 | 1.023E-02 | -1 | 2 | 1870    | 0 | 0 | 0 | 685    | 7092  |
| NM_001160145 | Tmem9        | 1.231 | 1.023E-02 | 0  | 0 | 338656  | 0 | 0 | 0 | 6716   | 9899  |
| NM_008859    | Prkcq        | 2.147 | 1.027E-02 | 0  | 0 | 24746   | 0 | 0 | 0 | 119    | 16338 |
| NM_153057    | Nomo1        | 1.166 | 1.027E-02 | 0  | 1 | 2018    | 0 | 1 | 0 | 71     | 23741 |
| NM_001025245 | Mbp          | 1.212 | 1.039E-02 | -1 | 1 | 2763    | 0 | 1 | 0 | 2757   | 3382  |
| NM_001077184 | Bsg          | 0.667 | 1.046E-02 | 0  | 1 | 19768   | 1 | 0 | 0 | 22498  | 13479 |
| NM_016903    | Esd          | 0.899 | 1.049E-02 | 0  | 1 | 1212    | 0 | 1 | 0 | 74     | 4096  |
| NM_139300    | Mylk         | 1.954 | 1.049E-02 | 0  | 1 | 47      | 0 | 1 | 0 | 123    | 3169  |
| NM_001082553 | Rab27b       | 2.823 | 1.054E-02 | -1 | 0 | 40025   | 0 | 1 | 0 | 448    | 38135 |
| NM_011101    | Prkca        | 2.189 | 1.058E-02 | 0  | 1 | 7592    | 0 | 0 | 0 | 332    | 18595 |
| NM_138741    | Sdpr         | 2.960 | 1.058E-02 | 0  | 0 | 23877   | 0 | 0 | 0 | 7234   | 11319 |
| NM_009112    | S100a10      | 0.863 | 1.067E-02 | 0  | 0 | 762425  | 0 | 0 | 0 | 1087   | 26351 |
| NM_028133    | Egln3        | 1.277 | 1.067E-02 | -1 | 1 | 15858   | 0 | 0 | 1 | 12466  | 43    |
| NM_001111279 | Wdfy1        | 0.963 | 1.071E-02 | 0  | 0 | 264215  | 0 | 1 | 1 | 548    | 153   |
| NM_173755    | Ube2o        | 1.920 | 1.071E-02 | -1 | 4 | 621     | 0 | 0 | 0 | 1317   | 62    |
| NM_029555    | Gstk1        | 0.646 | 1.073E-02 | 0  | 0 | 53599   | 0 | 0 | 0 | 18790  | 6726  |
| NM_145100    | Lypd1        | 2.206 | 1.073E-02 | 0  | 0 | 127888  | 0 | 0 | 0 | 248949 | 5524  |
| NM_020626    | Tmem27       | 2.636 | 1.075E-02 | 0  | 1 | 2557    | 0 | 0 | 0 | 2619   | 5627  |
| NM_028011    | Tom1l1       | 1.717 | 1.079E-02 | 0  | 1 | 11714   | 0 | 1 | 0 | 29     | 49406 |
| NM_001160406 | Gfi1b        | 1.263 | 1.080E-02 | 0  | 0 | 23722   | 1 | 0 | 1 | 8      | 560   |
| NM_011421    | Smpd1        | 0.952 | 1.080E-02 | 0  | 0 | 1123194 | 0 | 0 | 0 | 14     | 5     |
| NM_026056    | Cap2         | 2.247 | 1.080E-02 | 0  | 1 | 9072    | 0 | 0 | 0 | 95     | 5455  |
| NM_145384    | Pqlc2        | 1.032 | 1.080E-02 | 0  | 0 | 76102   | 0 | 0 | 0 | 413    | 2972  |
| NM_024211    | Slc25a11     | 0.776 | 1.080E-02 | 0  | 1 | 7849    | 0 | 1 | 1 | 513    | 7149  |
| NM_028135    | LOC100047091 | 2.351 | 1.088E-02 | 0  | 1 | 17789   | 0 | 0 | 0 | 650    | 2559  |
| NM_023732    | Abcb6        | 0.940 | 1.088E-02 | 0  | 1 | 864     | 1 | 1 | 0 | 871    | 7731  |
| NM_001113423 | Slain2       | 1.403 | 1.093E-02 | 0  | 0 | 31714   | 0 | 1 | 0 | 20     | 3174  |

|              |               |       |           |    |   |         |   |   |   |        |        |
|--------------|---------------|-------|-----------|----|---|---------|---|---|---|--------|--------|
| NM_146168    | Vopp1         | 1.116 | 1.097E-02 | 0  | 0 | 21833   | 0 | 0 | 0 | 649    | 11901  |
| NM_139144    | Ogt           | 0.756 | 1.111E-02 | 0  | 0 | 260179  | 0 | 0 | 0 | 78     | 144    |
| NM_001164268 | Kalrn         | 1.318 | 1.125E-02 | 0  | 0 | 42046   | 0 | 0 | 0 | 171627 | 22001  |
| NM_030113    | Arhgap10      | 0.737 | 1.129E-02 | 0  | 0 | 75226   | 0 | 0 | 1 | 169    | 44519  |
| NM_021409    | Pard6b        | 0.713 | 1.129E-02 | 0  | 0 | 21983   | 0 | 0 | 0 | 385    | 11038  |
| NM_001039090 | Skil          | 1.213 | 1.132E-02 | 0  | 0 | 33685   | 0 | 1 | 1 | 440    | 494    |
| NM_001163753 | Rab37         | 0.915 | 1.133E-02 | 0  | 0 | 125855  | 0 | 1 | 0 | 19251  | 16881  |
| NM_019464    | Sh3glb1       | 0.671 | 1.136E-02 | 0  | 0 | 31885   | 0 | 0 | 0 | 147    | 14157  |
| NM_028814    | 2810403A07Rik | 0.629 | 1.138E-02 | 0  | 0 | 20887   | 0 | 0 | 0 | 46     | 26     |
| NM_023324    | Peli1         | 0.904 | 1.138E-02 | 0  | 1 | 8474    | 0 | 1 | 0 | 149    | 522    |
| NM_025486    | Tmem208       | 0.705 | 1.138E-02 | 0  | 1 | 13708   | 0 | 0 | 0 | 48     | 18714  |
| NM_026693    | Gabarapl2     | 0.695 | 1.143E-02 | 0  | 2 | 797     | 0 | 0 | 0 | 73     | 21980  |
| NM_029870    | A930001N09Rik | 0.716 | 1.144E-02 | 0  | 0 | 174514  | 0 | 0 | 0 | 29     | 446    |
| NM_001128080 | Tspan32       | 1.162 | 1.161E-02 | 0  | 0 | 38152   | 0 | 1 | 0 | 1505   | 42     |
| NM_027460    | Slc25a33      | 0.888 | 1.164E-02 | 0  | 1 | 6603    | 1 | 1 | 0 | 6514   | 36335  |
| NM_019718    | Arl3          | 0.718 | 1.170E-02 | 0  | 0 | 117271  | 0 | 0 | 0 | 106    | 111    |
| NM_028030    | Rbpms2        | 1.729 | 1.174E-02 | -1 | 1 | 1200    | 0 | 1 | 0 | 1225   | 20569  |
| NM_011123    | Plp1          | 1.903 | 1.174E-02 | 0  | 0 | 1932997 | 0 | 0 | 0 | 81089  | 81136  |
| NM_010786    | Mdm2          | 0.838 | 1.180E-02 | 0  | 1 | 7082    | 0 | 1 | 0 | 2      | 152    |
| NM_011452    | Serpib9b      | 1.561 | 1.199E-02 | 1  | 1 | 790     | 0 | 0 | 0 | 20951  | 126920 |
| NM_009127    | Scd1          | 2.532 | 1.199E-02 | -1 | 0 | 95501   | 0 | 0 | 0 | 630    | 51301  |
| NM_009109    | Ryr1          | 0.747 | 1.222E-02 | 0  | 0 | 247796  | 0 | 0 | 0 | 9650   | 2214   |
| NM_001038602 | Marveld2      | 1.424 | 1.226E-02 | 0  | 0 | 112604  | 0 | 0 | 0 | 17452  | 12558  |
| NM_181820    | Tmc4          | 0.980 | 1.239E-02 | 0  | 0 | 459354  | 0 | 1 | 0 | 2178   | 6474   |
| NM_001122683 | Bdh1          | 0.635 | 1.241E-02 | 0  | 0 | 65074   | 0 | 0 | 0 | 322    | 3672   |
| NM_008786    | Pcmt1         | 0.588 | 1.241E-02 | 0  | 0 | 121731  | 0 | 0 | 0 | 520    | 641    |
| NM_001159401 | Upp1          | 1.037 | 1.244E-02 | 0  | 0 | 93040   | 0 | 0 | 0 | 91     | 8      |
| NM_023716    | Tubb2b        | 2.058 | 1.253E-02 | 0  | 0 | 52331   | 0 | 1 | 0 | 28300  | 19229  |
| NM_001001326 | St5           | 1.235 | 1.273E-02 | 0  | 0 | 38005   | 0 | 0 | 0 | 11894  | 53721  |
| NM_001166408 | Rai14         | 0.786 | 1.273E-02 | 0  | 1 | 9060    | 0 | 1 | 0 | 61     | 37071  |
| NM_001083315 | St7           | 1.141 | 1.277E-02 | -1 | 3 | 262     | 0 | 1 | 1 | 170    | 286    |
| NM_011777    | Zyx           | 1.257 | 1.302E-02 | 0  | 3 | 906     | 0 | 0 | 0 | 52     | 102    |

|              |              |       |           |    |   |         |   |   |   |        |       |
|--------------|--------------|-------|-----------|----|---|---------|---|---|---|--------|-------|
| NM_008808    | Pdgfa        | 0.868 | 1.308E-02 | 0  | 0 | 89536   | 0 | 0 | 0 | 29744  | 2698  |
| NM_011896    | LOC100046643 | 2.118 | 1.315E-02 | -1 | 0 | 32618   | 0 | 1 | 0 | 90     | 3464  |
| NM_026058    | Lass4        | 0.654 | 1.346E-02 | 0  | 0 | 254714  | 1 | 0 | 1 | 8      | 36    |
| NM_010826    | Mrv1         | 3.543 | 1.351E-02 | -1 | 2 | 4386    | 0 | 0 | 0 | 1622   | 10492 |
| NM_016965    | Nckap1       | 1.992 | 1.351E-02 | 0  | 1 | 16172   | 0 | 0 | 0 | 693    | 781   |
| NM_013520    | Flt3l        | 1.044 | 1.357E-02 | -1 | 0 | 26153   | 0 | 0 | 0 | 1191   | 87    |
| NM_025635    | Zwint        | 0.922 | 1.360E-02 | 0  | 2 | 437     | 0 | 0 | 0 | 134    | 18796 |
| NM_144865    | Reep2        | 1.252 | 1.367E-02 | 0  | 0 | 113814  | 0 | 1 | 0 | 1046   | 13986 |
| NM_024432    | Ubxn6        | 0.597 | 1.373E-02 | 0  | 0 | 43917   | 0 | 1 | 0 | 69     | 37    |
| NM_181039    | Lphn1        | 0.648 | 1.373E-02 | 0  | 0 | 159958  | 0 | 0 | 1 | 96     | 126   |
| NM_032398    | Plvap        | 1.105 | 1.373E-02 | 0  | 0 | 63481   | 0 | 0 | 0 | 49     | 21914 |
| NM_019980    | Litaf        | 0.762 | 1.393E-02 | 0  | 0 | 27844   | 0 | 0 | 0 | 865    | 2396  |
| NM_181411    | Aftph        | 1.314 | 1.395E-02 | 0  | 0 | 155078  | 0 | 0 | 0 | 89     | 14    |
| NM_001146100 | Hk1          | 0.759 | 1.399E-02 | 0  | 0 | 109700  | 0 | 0 | 0 | 991    | 129   |
| NM_133838    | Ehd4         | 0.795 | 1.404E-02 | 0  | 0 | 162947  | 0 | 0 | 0 | 943    | 9565  |
| NM_007722    | Cxcr7        | 2.260 | 1.404E-02 | -1 | 0 | 71170   | 1 | 0 | 0 | 263449 | 10071 |
| NM_013835    | Trove2       | 1.719 | 1.417E-02 | -1 | 0 | 43489   | 0 | 0 | 0 | 71     | 2026  |
| NM_001042743 | Mast2        | 0.666 | 1.417E-02 | 0  | 0 | 61281   | 1 | 0 | 0 | 172    | 57495 |
| NM_019976    | Psrc1        | 0.761 | 1.417E-02 | 0  | 0 | 29099   | 0 | 0 | 0 | 5485   | 38646 |
| NM_010060    | Dnahc11      | 0.659 | 1.417E-02 | 0  | 1 | 9297    | 1 | 0 | 0 | 22320  | 68241 |
| NM_009026    | Rasd1        | 1.684 | 1.445E-02 | -1 | 0 | 78961   | 0 | 1 | 1 | 31     | 45393 |
| NM_001029841 | Sla          | 1.557 | 1.445E-02 | 0  | 0 | 150311  | 0 | 0 | 0 | 6277   | 62849 |
| NM_029983    | Sla2         | 1.783 | 1.447E-02 | 0  | 1 | 13270   | 0 | 0 | 0 | 187    | 216   |
| NM_032465    | Cd96         | 1.805 | 1.455E-02 | -1 | 0 | 475604  | 0 | 1 | 0 | 22     | 10668 |
| NM_008409    | Itm2a        | 1.450 | 1.455E-02 | 0  | 0 | 1213802 | 0 | 1 | 0 | 152728 | 50011 |
| NM_001130174 | Tnnt2        | 1.354 | 1.467E-02 | 1  | 0 | 198716  | 0 | 1 | 0 | 8266   | 53018 |
| NM_011987    | Pla2g10      | 2.455 | 1.487E-02 | -1 | 0 | 36032   | 0 | 1 | 0 | 518    | 15932 |
| NM_013757    | Sytl4        | 0.917 | 1.487E-02 | -1 | 0 | 318686  | 0 | 0 | 0 | 77525  | 6268  |
| NM_001042487 | Dlgap4       | 0.909 | 1.510E-02 | 0  | 0 | 25199   | 0 | 0 | 0 | 1121   | 794   |
| NM_025926    | Dnajb4       | 1.892 | 1.511E-02 | -1 | 0 | 45150   | 1 | 0 | 0 | 21     | 379   |
| NM_052976    | Ophn1        | 1.926 | 1.511E-02 | -1 | 1 | 13414   | 0 | 1 | 1 | 59     | 13523 |
| NM_145130    | Lpcat3       | 0.644 | 1.511E-02 | 0  | 0 | 29693   | 0 | 1 | 0 | 29     | 16992 |



|              |               |       |           |    |   |         |   |   |   |        |        |
|--------------|---------------|-------|-----------|----|---|---------|---|---|---|--------|--------|
| NM_001162532 | Fam174b       | 1.368 | 1.511E-02 | -1 | 0 | 180100  | 0 | 0 | 0 | 25020  | 20355  |
| NM_001045489 | Mfge8         | 0.794 | 1.515E-02 | 1  | 0 | 56165   | 0 | 0 | 0 | 19     | 25371  |
| NM_007920    | Elf1          | 0.688 | 1.522E-02 | -1 | 0 | 55055   | 0 | 0 | 0 | 134    | 116    |
| NM_026677    | Rab13         | 1.475 | 1.523E-02 | 0  | 0 | 58964   | 0 | 0 | 0 | 7163   | 16373  |
| NM_028238    | Rab38         | 1.239 | 1.581E-02 | 0  | 1 | 12014   | 0 | 0 | 0 | 18     | 26583  |
| NM_001146180 | Mtss1         | 1.201 | 1.590E-02 | 0  | 0 | 25369   | 0 | 1 | 0 | 1354   | 16893  |
| NM_201357    | Tssc1         | 0.779 | 1.609E-02 | 0  | 2 | 1016    | 0 | 0 | 0 | 59     | 115915 |
| NM_030725    | Syt13         | 2.386 | 1.609E-02 | -1 | 0 | 33761   | 0 | 0 | 0 | 3991   | 68181  |
| NM_020010    | Cyp51         | 0.976 | 1.649E-02 | 0  | 0 | 231003  | 0 | 0 | 0 | 115    | 30     |
| NM_146126    | Sord          | 1.150 | 1.653E-02 | -1 | 2 | 807     | 1 | 0 | 0 | 8111   | 7990   |
| NM_018761    | Ctnnal1       | 1.511 | 1.657E-02 | 0  | 0 | 72099   | 0 | 0 | 0 | 152    | 3437   |
| NM_001110273 | Slc14a2       | 1.044 | 1.657E-02 | -1 | 1 | 16796   | 0 | 0 | 0 | 6707   | 36101  |
| NM_026740    | Slc46a1       | 0.741 | 1.657E-02 | 0  | 1 | 18342   | 0 | 0 | 0 | 43855  | 32110  |
| NM_019482    | Panx1         | 0.656 | 1.662E-02 | -1 | 2 | 7621    | 0 | 1 | 0 | 2      | 27148  |
| NM_025649    | Mad2l1bp      | 1.039 | 1.665E-02 | 0  | 1 | 14768   | 0 | 1 | 0 | 17     | 69     |
| NM_027406    | Aldh1l1       | 1.109 | 1.674E-02 | 0  | 0 | 21225   | 0 | 0 | 0 | 54927  | 150585 |
| NM_013489    | Cd84          | 1.668 | 1.680E-02 | 0  | 2 | 5042    | 0 | 0 | 0 | 33     | 6483   |
| NM_001077638 | Prmt2         | 0.990 | 1.680E-02 | 0  | 0 | 69015   | 0 | 1 | 0 | 115    | 44264  |
| NM_001168471 | Dynll2        | 0.728 | 1.682E-02 | 0  | 1 | 5984    | 0 | 0 | 0 | 49308  | 9443   |
| NM_009502    | Vcl           | 1.609 | 1.705E-02 | 0  | 0 | 83934   | 0 | 0 | 0 | 318    | 290    |
| NM_025760    | Ptplad2       | 1.581 | 1.705E-02 | -1 | 1 | 955     | 1 | 1 | 0 | 950    | 31859  |
| NM_008150    | Gpc4          | 2.380 | 1.710E-02 | 0  | 0 | 1169479 | 0 | 0 | 0 | 225437 | 47466  |
| NM_009270    | Sqle          | 0.863 | 1.711E-02 | 0  | 0 | 43441   | 0 | 1 | 0 | 214    | 55880  |
| NM_133888    | Smpd13b       | 1.043 | 1.750E-02 | 0  | 0 | 21587   | 0 | 0 | 0 | 3235   | 47219  |
| NM_025785    | Fbxo25        | 0.675 | 1.764E-02 | 0  | 0 | 127099  | 0 | 0 | 0 | 61     | 40     |
| NM_010262    | Gbx2          | 2.098 | 1.767E-02 | -1 | 0 | 31768   | 0 | 1 | 1 | 1919   | 7728   |
| NM_023305    | Ubap1         | 0.712 | 1.775E-02 | 0  | 3 | 3935    | 0 | 0 | 0 | 88     | 12682  |
| NM_181821    | Hcfc1r1       | 0.626 | 1.780E-02 | 0  | 0 | 129205  | 0 | 1 | 1 | 48     | 75299  |
| NM_008129    | Gclm          | 1.703 | 1.794E-02 | 0  | 2 | 68      | 1 | 1 | 1 | 32     | 57     |
| NM_026738    | 1110007C09Rik | 0.982 | 1.794E-02 | 0  | 1 | 15231   | 1 | 1 | 0 | 2209   | 988    |
| NM_008679    | Ncoa3         | 1.014 | 1.794E-02 | 0  | 1 | 9605    | 0 | 1 | 0 | 8888   | 3541   |
| NM_008880    | Plscr2        | 2.339 | 1.803E-02 | 0  | 0 | 129423  | 0 | 0 | 0 | 965    | 1351   |

|              |          |       |           |    |   |         |   |   |   |        |        |
|--------------|----------|-------|-----------|----|---|---------|---|---|---|--------|--------|
| NM_001002011 | Lmna     | 1.187 | 1.806E-02 | 0  | 3 | 7997    | 0 | 1 | 0 | 43     | 6876   |
| NM_009657    | Aldoc    | 1.294 | 1.806E-02 | -1 | 0 | 123160  | 0 | 0 | 0 | 4166   | 21767  |
| NM_008385    | Inpp5b   | 0.856 | 1.812E-02 | 0  | 0 | 45908   | 0 | 1 | 0 | 7974   | 30889  |
| NM_009325    | Tbxa2r   | 1.129 | 1.815E-02 | 0  | 0 | 29826   | 0 | 0 | 0 | 1704   | 737    |
| NM_001042451 | Snca     | 2.407 | 1.826E-02 | 0  | 0 | 22884   | 0 | 0 | 0 | 827    | 564    |
| NM_022410    | Myh9     | 1.229 | 1.840E-02 | -1 | 2 | 7626    | 0 | 1 | 0 | 4285   | 127    |
| NM_021896    | Gucy1a3  | 1.849 | 1.840E-02 | 0  | 0 | 83948   | 0 | 1 | 0 | 4864   | 12     |
| NM_001177841 | Otub2    | 0.611 | 1.840E-02 | 0  | 0 | 102839  | 0 | 1 | 0 | 5021   | 37235  |
| NM_008576    | Abcc1    | 0.829 | 1.844E-02 | 0  | 3 | 4671    | 0 | 0 | 0 | 191    | 32519  |
| NM_145562    | Parm1    | 1.140 | 1.844E-02 | 0  | 0 | 23291   | 0 | 0 | 0 | 215324 | 39997  |
| NM_008571    | Mcpt2    | 3.899 | 1.852E-02 | -1 | 0 | 163943  | 0 | 0 | 0 | 51443  | 257133 |
| NM_001163552 | Ap4b1    | 0.764 | 1.852E-02 | 0  | 1 | 9842    | 1 | 1 | 0 | 28     | 92     |
| NM_001110147 | Tnk2     | 0.766 | 1.852E-02 | 0  | 0 | 44369   | 0 | 1 | 0 | 6548   | 286    |
| NM_029649    | Tmem101  | 0.755 | 1.860E-02 | 0  | 0 | 128712  | 0 | 0 | 0 | 16     | 52590  |
| NM_019521    | Gas6     | 1.249 | 1.860E-02 | 1  | 0 | 100524  | 0 | 1 | 0 | 94671  | 1602   |
| NM_017379    | Tuba8    | 1.495 | 1.860E-02 | 0  | 2 | 4250    | 0 | 1 | 1 | 206    | 4219   |
| NM_028375    | Cxx1c    | 1.586 | 1.862E-02 | 0  | 0 | 2562477 | 0 | 0 | 0 | 187372 | 83110  |
| NM_009743    | Bcl2l1   | 0.802 | 1.865E-02 | 0  | 0 | 42695   | 0 | 1 | 1 | 0      | 860    |
| NM_009761    | Bnip3l   | 0.679 | 1.865E-02 | 0  | 0 | 89454   | 0 | 0 | 0 | 148    | 25     |
| NM_011738    | Ywhah    | 0.693 | 1.865E-02 | 0  | 0 | 254570  | 0 | 0 | 0 | 2005   | 2783   |
| NM_027144    | Arhgef12 | 1.296 | 1.868E-02 | 0  | 1 | 3125    | 1 | 0 | 0 | 479    | 423    |
| NM_145521    | Ppapdc3  | 1.230 | 1.868E-02 | 0  | 0 | 34339   | 0 | 1 | 0 | 5722   | 7100   |
| NM_172601    | Rab2b    | 0.654 | 1.868E-02 | 0  | 0 | 175205  | 0 | 1 | 0 | 138    | 21493  |
| NM_009177    | St3gal1  | 1.129 | 1.868E-02 | 0  | 2 | 3999    | 0 | 0 | 0 | 45     | 23548  |
| NM_133859    | Olfml3   | 0.765 | 1.883E-02 | 1  | 2 | 7970    | 0 | 0 | 0 | 407    | 3502   |
| NM_009931    | Col4a1   | 0.659 | 1.883E-02 | 0  | 0 | 54129   | 0 | 0 | 0 | 10109  | 45551  |
| NM_008740    | Nsf      | 0.806 | 1.905E-02 | 0  | 0 | 47253   | 0 | 1 | 0 | 10054  | 4854   |
| NM_028176    | Cda      | 0.602 | 1.905E-02 | 1  | 1 | 11339   | 0 | 0 | 0 | 22904  | 63206  |
| NM_013605    | Muc1     | 1.931 | 1.907E-02 | 0  | 0 | 192558  | 1 | 0 | 0 | 767    | 3619   |
| NM_010761    | Ccndbp1  | 0.728 | 1.907E-02 | 0  | 0 | 74391   | 0 | 0 | 0 | 2      | 4881   |
| NM_011104    | Prkce    | 0.809 | 1.941E-02 | -1 | 0 | 20234   | 0 | 1 | 0 | 200    | 20869  |
| NM_025768    | Grtp1    | 1.248 | 1.941E-02 | 0  | 1 | 8255    | 1 | 0 | 0 | 13038  | 295    |

|              |              |       |           |    |   |        |   |   |   |        |       |
|--------------|--------------|-------|-----------|----|---|--------|---|---|---|--------|-------|
| NM_016852    | Wbp2         | 0.910 | 1.960E-02 | 0  | 2 | 93     | 0 | 1 | 0 | 7      | 1743  |
| NM_001159616 | Pigp         | 0.796 | 1.965E-02 | 0  | 0 | 108668 | 0 | 0 | 0 | 7      | 19650 |
| NM_175684    | Fchsd1       | 0.783 | 1.965E-02 | 0  | 0 | 86030  | 1 | 1 | 0 | 22     | 18553 |
| NM_018797    | LOC100044106 | 1.091 | 1.965E-02 | 0  | 1 | 4844   | 0 | 0 | 0 | 3818   | 1666  |
| NM_013738    | Plek2        | 0.726 | 1.965E-02 | 0  | 0 | 118460 | 0 | 0 | 0 | 4028   | 4154  |
| NM_001159593 | Slc20a1      | 0.965 | 1.990E-02 | 0  | 1 | 8162   | 0 | 0 | 0 | 243    | 48066 |
| NM_001029936 | Cytsb        | 1.566 | 1.991E-02 | 0  | 0 | 54718  | 0 | 0 | 0 | 298    | 611   |
| NM_178785    | Rasal3       | 0.804 | 2.001E-02 | 0  | 1 | 4955   | 0 | 1 | 1 | 652    | 615   |
| NM_009242    | Sparc        | 1.216 | 2.008E-02 | 1  | 0 | 48911  | 0 | 0 | 0 | 2147   | 15764 |
| NM_138753    | Hexim1       | 1.016 | 2.042E-02 | 0  | 0 | 130323 | 0 | 0 | 0 | 159    | 16551 |
| NM_007737    | Col5a2       | 0.638 | 2.042E-02 | 0  | 0 | 357248 | 1 | 1 | 0 | 292130 | 67672 |
| NM_013723    | Podxl        | 1.259 | 2.048E-02 | 0  | 0 | 52154  | 0 | 0 | 1 | 28941  | 17088 |
| NM_001136084 | Tph1         | 0.896 | 2.072E-02 | 0  | 0 | 79794  | 0 | 0 | 0 | 14874  | 5526  |
| NM_028454    | Tm7sf2       | 1.213 | 2.080E-02 | -1 | 0 | 34475  | 0 | 0 | 0 | 6697   | 17029 |
| NM_027356    | Ufsp1        | 1.867 | 2.139E-02 | 0  | 0 | 102892 | 1 | 1 | 0 | 163    | 202   |
| NM_008795    | Cdk18        | 0.725 | 2.139E-02 | 1  | 0 | 125075 | 0 | 0 | 0 | 3594   | 6031  |
| NM_001177776 | Ahi1         | 0.836 | 2.141E-02 | 0  | 2 | 11496  | 0 | 0 | 0 | 13876  | 4780  |
| NM_013784    | Pign         | 0.966 | 2.143E-02 | 0  | 0 | 231222 | 0 | 0 | 0 | 466    | 333   |
| NM_023422    | Gm11277      | 2.497 | 2.153E-02 | -1 | 0 | 74836  | 1 | 0 | 0 | 632    | 54675 |
| NM_007670    | Cdkn2b       | 1.898 | 2.153E-02 | 0  | 0 | 60659  | 1 | 1 | 0 | 25386  | 2457  |
| NM_026252    | Cpeb4        | 1.416 | 2.178E-02 | 0  | 0 | 47377  | 0 | 0 | 0 | 1416   | 774   |
| NM_008548    | Man1a        | 1.193 | 2.179E-02 | -1 | 2 | 95     | 0 | 1 | 0 | 34     | 41559 |
| NM_019447    | Hgfac        | 1.617 | 2.206E-02 | 1  | 1 | 5605   | 0 | 1 | 1 | 5606   | 5558  |
| NM_021422    | Dnaja4       | 0.939 | 2.218E-02 | 0  | 0 | 57817  | 0 | 0 | 0 | 16602  | 35032 |
| NM_008608    | Mmp14        | 0.874 | 2.235E-02 | 0  | 0 | 47204  | 0 | 1 | 0 | 2081   | 4844  |
| NM_007743    | Col1a2       | 1.439 | 2.247E-02 | 0  | 1 | 11689  | 0 | 0 | 0 | 48683  | 6236  |
| NM_181569    | Nprl3        | 0.653 | 2.277E-02 | 0  | 2 | 2313   | 0 | 1 | 1 | 12     | 2347  |
| NM_001145779 | Kif2a        | 0.839 | 2.283E-02 | 0  | 3 | 2392   | 1 | 0 | 0 | 3646   | 280   |
| NM_011785    | Akt3         | 1.267 | 2.283E-02 | 0  | 0 | 364094 | 0 | 0 | 0 | 9847   | 51647 |
| NM_001170537 | Mef2c        | 0.945 | 2.284E-02 | 0  | 0 | 56360  | 0 | 0 | 0 | 14347  | 11479 |
| NM_013838    | Trpc6        | 2.900 | 2.289E-02 | -1 | 0 | 155905 | 0 | 0 | 0 | 3      | 49966 |
| NM_024229    | Pcyt2        | 0.751 | 2.289E-02 | 0  | 3 | 5093   | 0 | 0 | 0 | 296    | 7119  |

|              |               |       |           |    |   |         |   |   |   |       |        |
|--------------|---------------|-------|-----------|----|---|---------|---|---|---|-------|--------|
| NM_009695    | Apoc2         | 0.616 | 2.289E-02 | 1  | 0 | 124026  | 0 | 0 | 0 | 9207  | 12487  |
| NM_011500    | Strn          | 0.712 | 2.291E-02 | 0  | 1 | 11680   | 0 | 1 | 0 | 227   | 226    |
| NM_019919    | Ltbp1         | 2.501 | 2.298E-02 | -1 | 0 | 53257   | 0 | 0 | 0 | 552   | 665    |
| NM_172471    | Itih5         | 0.953 | 2.313E-02 | 0  | 0 | 41732   | 0 | 0 | 0 | 759   | 25792  |
| NM_172779    | Ddx26b        | 0.866 | 2.316E-02 | -1 | 0 | 465258  | 0 | 0 | 0 | 84    | 176100 |
| NM_001146153 | Homer3        | 1.071 | 2.342E-02 | 0  | 1 | 9927    | 1 | 1 | 0 | 184   | 30574  |
| NM_019760    | Serinc1       | 0.781 | 2.342E-02 | 0  | 0 | 449937  | 0 | 0 | 0 | 22    | 8763   |
| NM_178618    | Fam83g        | 0.609 | 2.342E-02 | 0  | 1 | 2959    | 0 | 0 | 0 | 31178 | 52834  |
| NM_009029    | Rb1           | 1.549 | 2.379E-02 | 0  | 0 | 24695   | 0 | 0 | 0 | 514   | 11132  |
| NM_025436    | Sc4mol        | 0.826 | 2.397E-02 | 0  | 0 | 326762  | 0 | 0 | 0 | 281   | 7608   |
| NM_026921    | Isca1         | 0.977 | 2.421E-02 | 0  | 1 | 81      | 0 | 1 | 1 | 156   | 187    |
| NM_177150    | Cenpt         | 0.684 | 2.453E-02 | 0  | 1 | 10159   | 0 | 1 | 0 | 292   | 1898   |
| NM_133764    | Atp6v0e2      | 0.928 | 2.479E-02 | 1  | 0 | 453542  | 0 | 1 | 0 | 15374 | 16674  |
| NM_027238    | Ttc39b        | 1.477 | 2.494E-02 | 0  | 0 | 49757   | 0 | 0 | 0 | 3933  | 39415  |
| NM_025745    | Erlec1        | 0.601 | 2.507E-02 | 0  | 0 | 180893  | 0 | 0 | 0 | 247   | 48066  |
| NM_027571    | P2ry12        | 2.095 | 2.534E-02 | -1 | 0 | 34870   | 0 | 1 | 0 | 1869  | 8291   |
| NM_175184    | Fam125b       | 0.865 | 2.552E-02 | 0  | 1 | 19394   | 0 | 0 | 0 | 3010  | 18482  |
| NM_053198    | Sfxn4         | 0.608 | 2.554E-02 | -1 | 0 | 42527   | 1 | 0 | 0 | 14    | 42187  |
| NM_008235    | Hes1          | 1.683 | 2.559E-02 | 0  | 1 | 2678    | 1 | 0 | 0 | 1014  | 1719   |
| NM_028207    | Dusp3         | 0.946 | 2.560E-02 | 0  | 0 | 31528   | 0 | 0 | 0 | 655   | 46     |
| NM_019472    | Myo10         | 0.698 | 2.569E-02 | 0  | 1 | 17946   | 0 | 0 | 0 | 296   | 37450  |
| NM_011309    | S100a1        | 0.807 | 2.599E-02 | 0  | 0 | 46243   | 0 | 1 | 0 | 69    | 14069  |
| NM_001164661 | Cyfip1        | 0.772 | 2.607E-02 | 0  | 1 | 11244   | 0 | 0 | 0 | 115   | 2478   |
| NM_001039515 | Arl4a         | 0.730 | 2.613E-02 | -1 | 1 | 10428   | 1 | 0 | 0 | 1187  | 35387  |
| NM_011173    | Pros1         | 1.173 | 2.626E-02 | 0  | 0 | 2341633 | 0 | 0 | 0 | 110   | 7230   |
| NM_173752    | 1110067D22Rik | 2.670 | 2.632E-02 | -1 | 0 | 65598   | 0 | 1 | 1 | 38016 | 503    |
| NM_010432    | Hipk1         | 0.832 | 2.642E-02 | -1 | 1 | 8398    | 1 | 1 | 0 | 84    | 1263   |
| NM_018729    | Cd244         | 1.572 | 2.648E-02 | -1 | 0 | 64972   | 0 | 0 | 0 | 2171  | 2144   |
| NM_013463    | Gla           | 1.218 | 2.714E-02 | -1 | 0 | 51333   | 0 | 1 | 0 | 182   | 18521  |
| NM_001001181 | BC031181      | 0.652 | 2.714E-02 | 0  | 1 | 16528   | 0 | 0 | 0 | 156   | 108141 |
| NM_026428    | Dcxr          | 0.803 | 2.716E-02 | 0  | 0 | 53669   | 1 | 0 | 0 | 13603 | 54137  |
| NM_013482    | Btk           | 0.963 | 2.720E-02 | -1 | 0 | 69198   | 0 | 1 | 0 | 111   | 656    |

|              |               |       |           |    |   |        |   |   |   |        |       |
|--------------|---------------|-------|-----------|----|---|--------|---|---|---|--------|-------|
| NM_010398    | C920025E04Rik | 1.827 | 2.720E-02 | 0  | 0 | 30616  | 0 | 1 | 0 | 8932   | 53471 |
| NM_010769    | Matn1         | 0.941 | 2.725E-02 | 1  | 0 | 30235  | 0 | 1 | 1 | 23152  | 25909 |
| NM_024208    | Echdc3        | 0.718 | 2.772E-02 | 0  | 1 | 324    | 0 | 1 | 0 | 336    | 7288  |
| NM_007527    | Bax           | 0.683 | 2.776E-02 | 0  | 3 | 5922   | 1 | 1 | 1 | 371    | 5828  |
| NM_001033634 | Zyg11b        | 0.646 | 2.780E-02 | 0  | 1 | 17753  | 0 | 1 | 0 | 660    | 65193 |
| NM_001009818 | 11-Sep        | 1.083 | 2.781E-02 | 0  | 0 | 32407  | 0 | 0 | 0 | 218    | 3021  |
| NM_030743    | Rnf114        | 0.630 | 2.781E-02 | 0  | 0 | 148590 | 0 | 0 | 0 | 217    | 2914  |
| NM_001039373 | Mtcp1         | 0.766 | 2.781E-02 | 0  | 0 | 257575 | 0 | 1 | 0 | 13696  | 61463 |
| NM_001083120 | Enah          | 0.666 | 2.796E-02 | 0  | 0 | 29920  | 0 | 0 | 0 | 51326  | 32293 |
| NM_001161796 | Gucy1b3       | 2.712 | 2.819E-02 | 0  | 1 | 12782  | 0 | 1 | 0 | 13     | 15810 |
| NM_013876    | Rnf11         | 1.207 | 2.827E-02 | 0  | 1 | 4691   | 1 | 0 | 0 | 2373   | 34    |
| NM_011851    | Nt5e          | 1.233 | 2.851E-02 | 0  | 0 | 35095  | 0 | 0 | 0 | 2771   | 40851 |
| NM_011643    | Trpc1         | 1.968 | 2.851E-02 | -1 | 1 | 4713   | 0 | 0 | 0 | 51739  | 51562 |
| NM_009679    | Ap2m1         | 0.603 | 2.888E-02 | 0  | 1 | 12714  | 1 | 0 | 0 | 231    | 4669  |
| NM_144822    | Cbara1        | 0.819 | 2.900E-02 | 0  | 1 | 5165   | 1 | 0 | 0 | 114    | 2831  |
| NM_029409    | Mff           | 0.709 | 2.902E-02 | 0  | 0 | 67492  | 0 | 0 | 0 | 74     | 2987  |
| NM_001162904 | Mdm1          | 1.197 | 2.905E-02 | 0  | 0 | 91261  | 0 | 1 | 0 | 32040  | 31190 |
| NM_010169    | F2r           | 1.358 | 2.913E-02 | 0  | 1 | 227    | 0 | 1 | 1 | 141    | 81    |
| NM_008624    | Mras          | 0.623 | 2.913E-02 | 0  | 0 | 179695 | 1 | 0 | 0 | 120994 | 10642 |
| NM_025943    | Dzip1         | 0.696 | 2.933E-02 | 0  | 0 | 120816 | 0 | 0 | 0 | 14511  | 235   |
| NM_007837    | Ddit3         | 2.089 | 2.933E-02 | -1 | 0 | 179623 | 0 | 0 | 0 | 219    | 234   |
| NM_001159965 | Ralgps2       | 0.991 | 2.933E-02 | 0  | 0 | 72000  | 0 | 0 | 0 | 444    | 719   |
| NM_008845    | Pip4k2a       | 0.620 | 2.933E-02 | 0  | 0 | 24712  | 0 | 0 | 0 | 227    | 20527 |
| NM_001077411 | Gba           | 0.612 | 2.933E-02 | 0  | 0 | 218682 | 1 | 0 | 0 | 59     | 14010 |
| NM_197989    | Fam58b        | 0.642 | 2.941E-02 | 0  | 0 | 151007 | 0 | 0 | 0 | 20372  | 0     |
| NM_007823    | Cyp4b1        | 0.989 | 2.966E-02 | 0  | 0 | 147653 | 0 | 0 | 0 | 84705  | 11460 |
| NM_001040684 | Hsd3b7        | 0.609 | 3.009E-02 | 0  | 1 | 19589  | 0 | 0 | 0 | 29     | 17660 |
| NM_007711    | Clcn3         | 0.819 | 3.013E-02 | 0  | 1 | 61     | 1 | 1 | 0 | 204    | 25760 |
| NM_138646    | Hps4          | 1.038 | 3.028E-02 | 0  | 0 | 100378 | 0 | 1 | 0 | 45     | 9161  |
| NM_020332    | Ank           | 1.046 | 3.058E-02 | 0  | 0 | 150530 | 0 | 0 | 0 | 2616   | 94    |
| NM_024477    | Ttc28         | 0.822 | 3.059E-02 | -1 | 0 | 28844  | 0 | 0 | 0 | 39802  | 57125 |
| NM_144819    | Ccdc92        | 0.679 | 3.065E-02 | 0  | 0 | 210317 | 0 | 0 | 0 | 493    | 34817 |

|              |               |       |           |    |   |        |   |   |   |       |       |
|--------------|---------------|-------|-----------|----|---|--------|---|---|---|-------|-------|
| NM_029530    | 6330527O06Rik | 0.632 | 3.065E-02 | 0  | 0 | 39230  | 0 | 1 | 0 | 39351 | 22978 |
| NM_145076    | Trim24        | 0.681 | 3.078E-02 | 0  | 1 | 7805   | 0 | 0 | 0 | 19    | 160   |
| NM_016671    | Il27ra        | 0.840 | 3.085E-02 | 0  | 0 | 148401 | 0 | 0 | 0 | 23915 | 23816 |
| NM_001164117 | Serpinb6a     | 1.478 | 3.120E-02 | 0  | 0 | 141939 | 0 | 1 | 0 | 28424 | 14882 |
| NM_138587    | Fam3c         | 0.710 | 3.170E-02 | 0  | 0 | 228113 | 0 | 0 | 0 | 104   | 81    |
| NM_053272    | Dhcr24        | 0.715 | 3.177E-02 | -1 | 0 | 52747  | 1 | 1 | 0 | 31115 | 48409 |
| NM_025980    | Nrarp         | 0.698 | 3.181E-02 | 0  | 1 | 7856   | 0 | 0 | 0 | 16030 | 16044 |
| NM_011018    | Sqstm1        | 0.742 | 3.181E-02 | 0  | 2 | 302    | 0 | 0 | 0 | 496   | 11077 |
| NM_001130525 | LOC100048460  | 0.708 | 3.183E-02 | 0  | 0 | 40238  | 0 | 0 | 0 | 687   | 323   |
| NM_026209    | 1810063B07Rik | 0.625 | 3.183E-02 | 0  | 0 | 395517 | 0 | 1 | 0 | 458   | 3038  |
| NM_009038    | Rcvrn         | 0.756 | 3.184E-02 | 0  | 0 | 159886 | 0 | 0 | 0 | 87024 | 41797 |
| NM_001081175 | Itpkb         | 0.802 | 3.195E-02 | 0  | 1 | 17390  | 0 | 0 | 0 | 83    | 91    |
| NM_026735    | Mobk1a        | 1.396 | 3.195E-02 | 0  | 1 | 3409   | 0 | 1 | 0 | 31    | 9698  |
| NM_008330    | Ifi47         | 0.942 | 3.216E-02 | 0  | 0 | 37308  | 1 | 0 | 0 | 718   | 9979  |
| NM_009373    | Tgm2          | 0.978 | 3.216E-02 | 1  | 0 | 52915  | 0 | 0 | 0 | 4226  | 8563  |
| NM_198294    | Tanc1         | 1.083 | 3.216E-02 | 0  | 0 | 189031 | 0 | 1 | 0 | 30848 | 2751  |
| NM_133986    | Tcta          | 0.668 | 3.257E-02 | 0  | 0 | 71125  | 0 | 0 | 0 | 155   | 1207  |
| NM_008590    | Mest          | 3.696 | 3.268E-02 | -1 | 1 | 1285   | 0 | 0 | 0 | 25409 | 1502  |
| NM_007465    | Birc2         | 0.608 | 3.268E-02 | 0  | 0 | 70481  | 0 | 0 | 0 | 1678  | 1732  |
| NM_010739    | Muc13         | 1.075 | 3.317E-02 | 0  | 0 | 61828  | 0 | 0 | 0 | 474   | 32389 |
| NM_028013    | Endod1        | 1.091 | 3.419E-02 | 0  | 0 | 178431 | 0 | 0 | 0 | 149   | 12613 |
| NM_011676    | Unc119        | 0.921 | 3.419E-02 | 0  | 0 | 103836 | 0 | 0 | 0 | 735   | 2443  |
| NM_009895    | Cish          | 0.799 | 3.419E-02 | 0  | 1 | 16228  | 0 | 0 | 0 | 27    | 15707 |
| NM_021344    | LOC100047138  | 3.083 | 3.419E-02 | -1 | 0 | 332411 | 0 | 1 | 0 | 20734 | 27327 |
| NM_010612    | Kdr           | 1.356 | 3.424E-02 | 0  | 0 | 512459 | 0 | 1 | 1 | 129   | 534   |
| NM_008376    | Gimap1        | 0.904 | 3.428E-02 | -1 | 0 | 454631 | 0 | 0 | 0 | 54    | 8661  |
| NM_145508    | Dyrk3         | 1.027 | 3.431E-02 | -1 | 2 | 845    | 0 | 0 | 0 | 116   | 3222  |
| NM_145425    | AV249152      | 0.682 | 3.431E-02 | -1 | 0 | 170876 | 0 | 0 | 0 | 389   | 21727 |
| NM_001025395 | Src           | 1.812 | 3.431E-02 | 0  | 0 | 27564  | 0 | 0 | 0 | 4593  | 6504  |
| NM_145360    | Idi1          | 1.067 | 3.466E-02 | 0  | 0 | 129074 | 1 | 0 | 0 | 14540 | 14475 |
| NM_007602    | Capn5         | 0.640 | 3.491E-02 | 0  | 0 | 207097 | 0 | 0 | 0 | 6941  | 9368  |
| NM_013748    | Clnk          | 1.584 | 3.491E-02 | 0  | 0 | 38545  | 0 | 0 | 0 | 11891 | 21665 |

|              |               |       |           |    |   |        |   |   |   |       |       |
|--------------|---------------|-------|-----------|----|---|--------|---|---|---|-------|-------|
| NM_011920    | Abcg2         | 1.131 | 3.493E-02 | 0  | 0 | 244694 | 1 | 0 | 0 | 274   | 25076 |
| NM_007780    | Csf2rb        | 0.596 | 3.493E-02 | 0  | 1 | 7432   | 0 | 0 | 0 | 11    | 54390 |
| NM_009517    | Zmat3         | 1.923 | 3.499E-02 | 1  | 0 | 52228  | 0 | 0 | 0 | 52    | 8742  |
| NM_153175    | Gimap6        | 0.812 | 3.510E-02 | -1 | 0 | 485433 | 0 | 0 | 0 | 21    | 4177  |
| NM_010117    | Rhbf1         | 1.012 | 3.510E-02 | 0  | 0 | 23529  | 1 | 0 | 0 | 2663  | 5362  |
| NM_009707    | Arhgap6       | 1.715 | 3.519E-02 | -1 | 1 | 9840   | 0 | 0 | 0 | 15610 | 27415 |
| NM_009696    | ApoE          | 1.479 | 3.556E-02 | 1  | 0 | 101724 | 0 | 0 | 0 | 3843  | 4264  |
| NM_020490    | Ltb4r2        | 0.919 | 3.556E-02 | 0  | 0 | 38366  | 0 | 0 | 0 | 4187  | 23065 |
| NM_001142952 | Fam46c        | 3.532 | 3.570E-02 | -1 | 0 | 48965  | 0 | 0 | 1 | 787   | 14466 |
| NM_001083934 | Myom1         | 1.783 | 3.590E-02 | 0  | 0 | 21544  | 0 | 0 | 1 | 148   | 16347 |
| NM_023348    | Snap29        | 0.620 | 3.599E-02 | -1 | 0 | 156024 | 0 | 0 | 0 | 44    | 64    |
| NM_026346    | Fbxo32        | 1.423 | 3.602E-02 | 0  | 0 | 69108  | 0 | 1 | 0 | 17939 | 524   |
| NM_007689    | Chad          | 1.960 | 3.648E-02 | 0  | 0 | 32383  | 0 | 0 | 0 | 485   | 31921 |
| NM_010554    | Ii1a          | 2.580 | 3.667E-02 | 0  | 0 | 46605  | 0 | 0 | 0 | 4153  | 7335  |
| NM_011203    | Ptpn12        | 0.904 | 3.670E-02 | 0  | 1 | 2070   | 0 | 0 | 0 | 443   | 695   |
| NM_023160    | Cml1          | 0.660 | 3.670E-02 | 0  | 0 | 303867 | 0 | 0 | 0 | 5     | 45761 |
| NM_139272    | Galnt2        | 0.907 | 3.681E-02 | -1 | 1 | 6726   | 0 | 0 | 0 | 3145  | 25205 |
| NM_009686    | Apbb2         | 0.733 | 3.688E-02 | 0  | 0 | 295353 | 0 | 1 | 0 | 94403 | 11677 |
| NM_025865    | 2310030G06Rik | 2.095 | 3.793E-02 | 1  | 0 | 198223 | 0 | 0 | 1 | 21656 | 21637 |
| NM_020050    | Tmem9b        | 0.803 | 3.798E-02 | 0  | 0 | 44664  | 0 | 0 | 0 | 6     | 179   |
| NM_138598    | D11Wsu99e     | 0.761 | 3.798E-02 | 0  | 1 | 2987   | 1 | 0 | 0 | 89    | 191   |
| NM_007781    | Csf2rb        | 1.195 | 3.805E-02 | 1  | 1 | 12953  | 0 | 0 | 0 | 15389 | 34004 |
| NM_146057    | Dap           | 0.666 | 3.838E-02 | 0  | 2 | 111    | 1 | 1 | 1 | 123   | 49    |
| NM_015783    | Gm9706        | 2.140 | 3.838E-02 | 0  | 1 | 2788   | 0 | 1 | 0 | 1838  | 10170 |
| NM_001145831 | Kifc3         | 1.137 | 3.838E-02 | 0  | 0 | 129867 | 0 | 1 | 0 | 38    | 37115 |
| NM_009665    | Amd1          | 0.689 | 3.838E-02 | -1 | 1 | 9346   | 0 | 0 | 1 | 33    | 9351  |
| NM_001113569 | Stxbp1        | 0.836 | 3.838E-02 | 0  | 0 | 70488  | 0 | 0 | 0 | 10422 | 89907 |
| NM_175093    | Trib3         | 1.261 | 3.861E-02 | -1 | 1 | 5888   | 0 | 1 | 0 | 89    | 718   |
| NM_009983    | Ctsd          | 1.159 | 3.873E-02 | 0  | 2 | 22     | 1 | 1 | 0 | 154   | 7292  |
| NM_022019    | Dusp10        | 1.350 | 3.902E-02 | 0  | 0 | 40463  | 0 | 0 | 0 | 49    | 1543  |
| NM_009141    | Cxcl5         | 2.007 | 3.946E-02 | 0  | 4 | 940    | 1 | 0 | 0 | 13    | 1583  |
| NM_008987    | Ptx3          | 0.900 | 3.946E-02 | 0  | 0 | 20772  | 0 | 1 | 0 | 20829 | 22184 |

|              |            |       |           |    |   |        |   |   |   |        |        |
|--------------|------------|-------|-----------|----|---|--------|---|---|---|--------|--------|
| NM_033541    | Oas1c      | 0.939 | 3.967E-02 | 0  | 0 | 86561  | 1 | 0 | 0 | 16     | 36691  |
| NM_008605    | Mmp12      | 3.599 | 3.980E-02 | 1  | 0 | 168748 | 0 | 0 | 0 | 125792 | 10450  |
| NM_001038609 | Mapt       | 0.629 | 3.983E-02 | 0  | 0 | 46958  | 0 | 0 | 0 | 801    | 36048  |
| NM_021461    | Mknk1      | 0.908 | 3.993E-02 | 0  | 1 | 16197  | 0 | 1 | 1 | 113    | 1524   |
| NM_025432    | Trappc2    | 1.332 | 4.000E-02 | 0  | 0 | 342722 | 0 | 0 | 0 | 3873   | 150960 |
| NM_178204    | Hist1h3a   | 0.943 | 4.000E-02 | -1 | 2 | 3300   | 0 | 0 | 0 | 4440   | 5642   |
| NM_019790    | Tmeff2     | 0.673 | 4.000E-02 | 0  | 1 | 7730   | 0 | 1 | 0 | 7740   | 12940  |
| NM_028331    | C1qtnf6    | 0.838 | 4.000E-02 | 0  | 1 | 18907  | 1 | 0 | 0 | 13571  | 32984  |
| NM_001159577 | Lnx1       | 0.683 | 4.000E-02 | 0  | 0 | 231881 | 0 | 0 | 0 | 167196 | 25177  |
| NM_053254    | Tle6       | 0.605 | 4.003E-02 | 0  | 1 | 9239   | 0 | 0 | 0 | 112    | 26689  |
| NM_145216    | Rasl10a    | 1.170 | 4.039E-02 | 0  | 1 | 7419   | 0 | 1 | 0 | 3798   | 3653   |
| NM_001159424 | Ii12a      | 1.827 | 4.079E-02 | 0  | 2 | 13426  | 0 | 1 | 1 | 1597   | 13542  |
| NM_013549    | Hist2h2aa1 | 2.537 | 4.079E-02 | -1 | 0 | 29278  | 0 | 1 | 0 | 2660   | 18737  |
| NM_007598    | Cap1       | 0.732 | 4.081E-02 | 0  | 2 | 1668   | 0 | 0 | 0 | 15     | 1      |
| NM_080448    | Srgap3     | 0.990 | 4.081E-02 | -1 | 0 | 105635 | 0 | 0 | 0 | 8699   | 8710   |
| NM_001029895 | Ate1       | 0.686 | 4.117E-02 | 0  | 1 | 9491   | 0 | 0 | 0 | 352    | 24742  |
| NM_001168525 | Sgms1      | 0.714 | 4.126E-02 | 0  | 0 | 44294  | 0 | 1 | 0 | 6657   | 30378  |
| NM_009794    | Capn2      | 1.536 | 4.160E-02 | 0  | 2 | 324    | 0 | 0 | 0 | 4374   | 13090  |
| NM_001112796 | Bicd1      | 0.657 | 4.163E-02 | 0  | 0 | 215144 | 1 | 1 | 0 | 4523   | 9695   |
| NM_010119    | Ehd1       | 0.820 | 4.165E-02 | 0  | 0 | 20203  | 1 | 0 | 0 | 805    | 965    |
| NM_008147    | Gp49a      | 1.384 | 4.169E-02 | 0  | 0 | 47578  | 0 | 0 | 0 | 124    | 9925   |
| NM_175353    | Exoc6      | 0.665 | 4.169E-02 | 0  | 1 | 11293  | 0 | 1 | 1 | 9452   | 11339  |
| NM_145541    | Rap1a      | 0.681 | 4.221E-02 | 0  | 1 | 10029  | 0 | 0 | 0 | 141    | 11827  |
| NM_010020    | Slc6a3     | 1.467 | 4.225E-02 | 0  | 0 | 271924 | 0 | 0 | 0 | 36319  | 42064  |
| NM_029519    | Rap2a      | 0.860 | 4.233E-02 | 0  | 0 | 40658  | 0 | 0 | 0 | 699    | 406    |
| NM_145441    | Gm6245     | 0.660 | 4.237E-02 | 0  | 0 | 517981 | 0 | 0 | 0 | 9724   | 9794   |
| NM_026126    | Fundc2     | 0.593 | 4.313E-02 | 0  | 0 | 291720 | 0 | 1 | 0 | 71     | 95608  |
| NM_010273    | Gdi1       | 0.919 | 4.325E-02 | 0  | 0 | 120375 | 1 | 0 | 0 | 7859   | 586    |
| NM_008570    | Mcpt1      | 2.762 | 4.328E-02 | -1 | 0 | 139784 | 0 | 0 | 0 | 71523  | 232974 |
| NM_001013833 | Prkg1      | 1.941 | 4.332E-02 | -1 | 0 | 145611 | 0 | 1 | 0 | 541    | 659    |
| NM_025378    | Ifitm3     | 0.587 | 4.403E-02 | 0  | 0 | 48089  | 0 | 0 | 0 | 2338   | 11146  |
| NM_010789    | Meis1      | 1.212 | 4.406E-02 | 0  | 0 | 48921  | 0 | 1 | 0 | 9      | 47848  |



|              |               |       |           |    |   |        |   |   |   |       |        |
|--------------|---------------|-------|-----------|----|---|--------|---|---|---|-------|--------|
| NM_198011    | 9130019O22Rik | 0.729 | 4.419E-02 | 0  | 0 | 120402 | 0 | 0 | 0 | 109   | 41885  |
| NM_021883    | Tmod1         | 0.772 | 4.428E-02 | 1  | 0 | 158825 | 0 | 0 | 0 | 67096 | 116    |
| NM_025638    | Gdpd1         | 0.987 | 4.457E-02 | 0  | 0 | 30881  | 0 | 0 | 0 | 10    | 46613  |
| NM_177231    | Arrb1         | 0.796 | 4.488E-02 | 0  | 2 | 2116   | 0 | 0 | 0 | 463   | 51894  |
| NM_009878    | Cdkn2d        | 0.839 | 4.516E-02 | 0  | 0 | 54597  | 0 | 0 | 1 | 3938  | 41382  |
| NM_145484    | Zfp758        | 0.660 | 4.554E-02 | 0  | 0 | 905758 | 0 | 0 | 0 | 62730 | 96725  |
| NM_025858    | Shisa5        | 0.708 | 4.611E-02 | 0  | 1 | 11382  | 0 | 0 | 0 | 74    | 93     |
| NM_177632    | Fam43a        | 1.391 | 4.611E-02 | -1 | 0 | 133917 | 0 | 0 | 0 | 56    | 3376   |
| NM_176837    | Arhgap18      | 1.315 | 4.615E-02 | -1 | 0 | 27240  | 0 | 1 | 1 | 96    | 11761  |
| NM_009419    | Tpst2         | 0.675 | 4.664E-02 | 0  | 0 | 33990  | 0 | 1 | 0 | 233   | 97     |
| NM_029494    | Rab30         | 1.091 | 4.684E-02 | 0  | 0 | 183430 | 0 | 0 | 0 | 187   | 578    |
| NM_025960    | Trappc6a      | 0.586 | 4.707E-02 | 0  | 1 | 8370   | 0 | 0 | 0 | 416   | 43598  |
| NM_013659    | Sema4b        | 0.672 | 4.719E-02 | -1 | 0 | 20511  | 0 | 0 | 0 | 11535 | 4845   |
| NM_019811    | Acss2         | 0.922 | 4.721E-02 | -1 | 0 | 50019  | 0 | 0 | 0 | 116   | 16     |
| NM_008331    | Ifit1         | 2.254 | 4.745E-02 | 0  | 1 | 10277  | 0 | 0 | 0 | 7230  | 12764  |
| NM_001079908 | Fgfr1         | 0.771 | 4.745E-02 | 1  | 0 | 53108  | 0 | 0 | 0 | 73507 | 83     |
| NM_001110850 | Crem          | 0.876 | 4.769E-02 | 0  | 0 | 66877  | 0 | 1 | 0 | 157   | 1960   |
| NM_008120    | Gja4          | 0.909 | 4.769E-02 | 0  | 0 | 330096 | 0 | 0 | 0 | 58    | 114271 |
| NM_029478    | Tmem49        | 0.596 | 4.811E-02 | 0  | 0 | 25778  | 1 | 0 | 0 | 12    | 15450  |
| NM_007405    | Adcy6         | 1.364 | 4.852E-02 | 0  | 0 | 75173  | 0 | 0 | 0 | 1379  | 31333  |
| NM_018784    | St3gal6       | 1.702 | 4.920E-02 | 0  | 1 | 4717   | 0 | 0 | 0 | 2682  | 89395  |
| NM_144813    | Slc24a1       | 1.566 | 4.978E-02 | 0  | 0 | 98312  | 0 | 0 | 0 | 9232  | 9200   |
| NM_010879    | LOC100044475  | 1.385 | 4.991E-02 | -1 | 0 | 31869  | 0 | 0 | 0 | 493   | 14198  |
| NM_009579    | Slc30a1       | 1.090 | 4.991E-02 | -1 | 0 | 26366  | 1 | 1 | 0 | 26421 | 23303  |
